1 A VP2/3-DERIVED PEPTIDE EXHIBITS POTENT ANTIVIRAL ACTIVITY AGAINST BK AND

2 JC POLYOMAVIRUSES BY TARGETING A NOVEL VP1 BINDING SITE

3

4 Joshua R. Kane<sup>1</sup>, Susan Fong<sup>1</sup>, Jacob Shaul<sup>1</sup>, Alexandra Frommlet<sup>1</sup>, Andreas O. Frank<sup>1</sup>, Mark

5 Knapp<sup>1</sup>, Dirksen E. Bussiere<sup>1</sup>, Peter Kim<sup>1</sup>, Elizabeth Ornelas<sup>1</sup>, Carlos Cuellar<sup>1</sup>, Johanna R.

6 Abend<sup>1</sup>, Charles A. Wartchow<sup>1</sup>

7

8 1. Novartis Institutes for BioMedical Research, Emeryville, California, USA

9

10

11

12

13

14

15

16

17

18

19

20

21

22

23

24

25

26

27 ABSTRACT

28

29 In pursuit of effective therapeutics for human polyomaviruses, we identified a peptide derived from  
30 the BK polyomavirus (BKV) minor structural proteins VP2/3 that is a potent inhibitor of BKV  
31 infection with no observable cellular toxicity. The thirteen amino acid peptide binds to major  
32 structural protein VP1 in a new location within the pore with a low nanomolar  $K_D$ . Alanine scanning  
33 of the peptide identified three key residues, substitution of each of which results in ~1000-fold  
34 loss of affinity with a concomitant reduction in antiviral activity. NMR spectroscopy and an X-ray  
35 structurally-guided model demonstrate specific binding of the peptide to the pore of the VP1  
36 pentamer that constitutes the BKV capsid. Cell-based assays with the peptide demonstrate  
37 nanomolar inhibition of BKV infection and suggest that the peptide likely blocks the viral entry  
38 pathway between endocytosis and escape from the host cell ER. The peptide motif is highly  
39 conserved among the polyomavirus clade, and homologous peptides exhibit similar binding  
40 properties for JC polyomavirus and inhibit infection with similar potency to BKV in a model cell  
41 line. Substitutions within VP1 or VP2/3 residues involved in VP1-peptide interaction negatively  
42 impact viral infectivity, potentially indicating the peptide-binding site within the VP1 pore is relevant  
43 for VP1-VP2/3 interactions. The inhibitory potential of the peptide-binding site first reported here  
44 may present a novel target for development of new anti-polyomavirus therapies. In summary, we  
45 present the first anti-polyomavirus inhibitor that acts via a novel mechanism of action by  
46 specifically targeting the pore of VP1.

47

48

49

50

51

52

## 53 INTRODUCTION

54

55 BK polyomavirus (BKV), also known as human polyomavirus 1, is a small non-enveloped virus  
56 with a circular double-stranded DNA genome. BKV was first isolated from an immunosuppressed  
57 kidney transplant recipient in 1971 (Gardner et al., 1971), and is among the few clinically important  
58 human polyomaviruses, including JC polyomavirus (JCV) (Padgett et al., 1971) and Merkel cell  
59 polyomavirus (Feng et al., 2008). BKV is ubiquitous in human populations, with an estimated  
60 ~80% sero-prevalence worldwide (Kean et al., 2009; Knowles, 2006). Primary exposure to BKV  
61 occurs in early childhood, with 50% of 3-year-olds and over 90% of 10-year-olds testing sero-  
62 positive (Knowles, 2001). Post-exposure, BKV infection is characterized by subclinical  
63 persistence with kidney tissue suspected as the viral reservoir (Ahsan and Shah, 2006; Heritage  
64 et al., 1981; Shinohara et al., 1993). Reactivation of BKV infection can occur in conditions of  
65 immunosuppression, particularly in the context of kidney and hematopoietic cell transplantation.  
66 BKV infection in kidney transplant recipients (KTRs) is first evident as viruria (20-70% of KTRs),  
67 which can progress to viremia (10-60%); BKV nephropathy (BKVN) is diagnosed in 3-4% of KTRs  
68 and 15-50% of those patients will suffer graft loss (Ambalathingal et al., 2017; Kuypers, 2012).  
69 The primary course of care for treating BKVN is reduction of immunosuppressive therapy which  
70 carries the risk of acute graft rejection; up to 30% of BKVN cases treated by reduction of  
71 immunosuppressive therapy will experience an acute rejection episode (Bohl and Brennan, 2007;  
72 Sood et al., 2012). BKV reactivation in allogeneic hematopoietic cell transplant recipients can  
73 result in hemorrhagic cystitis (HC). In a recent study, 16.6% of allogeneic hematopoietic cell  
74 transplantations developed HC with BKV detected in the urine in 90% of cases (Lunde et al.,  
75 2015). There are currently no FDA-approved antiviral therapies for BKV, presenting an unmet  
76 medical need for these indications.

77 The lifecycle of BKV begins with virion binding to host GT1b and GD1b ganglioside (Low et al.,  
78 2006). The virus subsequently undergoes endocytosis via a caveolin-dependent pathway (Eash  
79 et al., 2004) and is trafficked in endosomes to the endoplasmic reticulum (ER) (Jiang et al., 2009;  
80 Moriyama and Sorokin, 2008), where a series of host cell enzymes orchestrate capsid  
81 disassembly (Goodwin et al., 2011; Schelhaas et al., 2007). The partially disassembled particle  
82 then interfaces with components of the ER-associated degradation (ERAD) pathway to undergo  
83 a critical step of retrotranslocation from the ER lumen into the host cell cytosol (Bennett et al.,  
84 2013; Jiang et al., 2009). Nuclear localization signal (NLS) domains within the capsid minor  
85 structural proteins then interact with components of the host nuclear pore complex to facilitate  
86 nuclear import of the viral genome (Bennett et al., 2015), wherein host cell transcription machinery  
87 initiates viral gene expression (Helle et al., 2017). The BKV virion is not known to contain any  
88 enzymes, viral or host (Fang et al., 2010); entry pathway steps are carried out via interactions  
89 between viral and host cell factors, and intra-virion interactions between the major and minor  
90 capsid proteins (Zhao and Imperiale, 2017).

91 The polyomavirus virion consists of a capsid formed by the major structural protein VP1  
92 encapsidating the minor structural proteins VP2 and VP3, and the viral genome chromatinized  
93 with host histones (Cubitt, 2006). The capsid consists of 72 copies of homomeric VP1 pentamers  
94 cross-linked by intermolecular disulfide bonds to form a T=7d icosahedron structure (Nilsson et  
95 al., 2005). VP1 exists as a stable pentamer that contains a central pore, at the base of which a  
96 single copy of VP2 or VP3 is bound, forming a 5+1 complex as elucidated by X-ray and cryo-EM  
97 structures of infectious virions (Griffith et al., 1992; Hurdiss et al., 2018; Hurdiss et al., 2016;  
98 Liddington et al., 1991). All three structural proteins (VP1, VP2, and VP3) contain DNA binding  
99 domains (Clever et al., 1993; Soussi, 1986) and make contacts with the viral genome inside the  
100 infectious virion (Carbone et al., 2003; Hurdiss et al., 2016). VP2 and VP3 share a reading frame,  
101 with BKV VP3 consisting of the 232 carboxy-terminal residues of VP2 (Helle et al., 2017).

102 Reconstitution of the VP1 pentamer with full-length VP2 or VP3 has yet to be achieved;  
103 reconstitution of VP1 with a truncated VP2 protein and the corresponding X-ray structure has  
104 been reported for murine polyomavirus, implicating a “looping” structure for VP2 with the C-  
105 terminus interacting near the “base”, or inner virion-facing side, of the VP1 pentamer pore (Chen  
106 et al., 1998). Details of residues in the structural proteins contributing to the interactions of VP1  
107 and VP2/3 have been elucidated primarily using either genetic (Bennett et al., 2015) or co-  
108 precipitation assays (Barouch and Harrison, 1994). Through these experiments, a region shared  
109 by both VP2 and VP3 near the carboxy-terminus of both proteins has been identified as required  
110 for the interaction with VP1 (Nakanishi et al., 2006). The biological function of the VP1 pore above  
111 the site of VP1-VP2/3 interactions at the base of capsid pentamers is unknown. For simplicity  
112 when referring to regions of the pore, “top” indicates the region nearest the exterior of the virus,  
113 and “bottom” or “lower” indicate the region nearest the interior of the virus.

114 In the current study, we report the discovery of a thirteen amino acid BKV VP2/3-derived peptide  
115 D1<sub>min</sub> (corresponding to VP2 residues 290-302) that binds to BKV VP1 pentamers with single-  
116 digit nanomolar  $K_D$ . We show that homologous peptide derived from JCV VP2/3 binds JCV VP1  
117 with similar affinity, demonstrating a conserved binding interface. Protein-observed 2D NMR  
118 studies show this peptide interacts with VP1 residues in a previously uncharacterized location  
119 within the pore formed by pentameric VP1, with the binding location within the pore further  
120 corroborated by a structurally-guided model generated using X-ray data from co-complexed D1<sub>min</sub>  
121 and VP1. Treatment of cells with D1<sub>min</sub> in the context of BKV infection elicits nanomolar antiviral  
122 activity by the peptide, with a relationship established between peptide binding affinity to VP1  
123 pentamers and antiviral potency. Additionally, we show the peptide exhibits antiviral activity  
124 against JCV, potentially indicating a pan-antiviral mechanism. We demonstrate through cell-  
125 based assays that the antiviral mechanism of action (MoA) involves blocking key steps in the viral  
126 entry pathway, likely prior to the critical step of ER-to-cytosol retrotranslocation. Mutations of

127 residues in the VP1 pore that mediate peptide binding or of residues in the VP2/3 region from  
128 which the peptide is derived impact BKV infectivity, indicating the peptide-binding site may  
129 constitute a previously uncharacterized VP1-VP2/3 binding interface. In short, we report the first  
130 anti-BKV and anti-JCV molecule that directly targets the polyomavirus VP1 pentamer pore.

131

132

133

134

135

136

137

138

139

140

141

142

143

144

145

146

147 RESULTS

148

149 **VP2/3-derived peptide binds pentameric capsid protein VP1 with high affinity**

150 In order to better characterize the structural relationship between the BKV major structural protein  
151 VP1 and the minor capsid proteins VP2 and VP3, we focused on a stretch of amino acids near  
152 the carboxyl-terminus of VP2/3 previously referenced as “D1” (Nakanishi et al., 2006). The region  
153 is highly conserved among polyomaviruses, including JCV and simian virus 40 (SV40) (**Figure**  
154 **1A; Supplemental Figure S1**). We initially tested binding of a 22-mer peptide VP2<sub>281-302</sub>  
155 (APGGANQRTAPQWMLPLLLGLY; D1<sub>22</sub>) to purified BKV VP1 pentamers (VP1<sub>2-362</sub>) by Biacore  
156 surface plasmon resonance (SPR) and measured high affinity binding to the pentamer ( $K_D = 4.8$   
157 nM; **Figure 1B,C; Table 1**). The curve from a 1:1 interaction model overlays well with the SPR  
158 data (**Figure 1C**), consistent with a high quality, specific interaction, despite the hydrophobic  
159 nature of this peptide. In addition to directly measuring binding affinity by SPR, we developed an  
160 AlphaScreen assay to detect binding of carboxy-terminus biotinylated D1<sub>22</sub> to VP1 and measure  
161 the half-maximal concentration at which the biotinylated peptide is displaced by unlabeled peptide  
162 ( $IC_{50}$ ) (**Figure 1D, Table 1**). The  $IC_{50}$  for unlabeled D1<sub>22</sub> is  $11 \pm 2.9$  nM and this value is comparable  
163 to the SPR-determined  $K_D$ . We additionally tested the homologous D1<sub>22</sub> sequence from JCV with  
164 its cognate VP1 pentamer, and observed an  $IC_{50}$  of  $44 \pm 6.4$  nM (**Figure 1D, Supplemental Table**  
165 **S1**). Noting that protein-protein interactions often involve “molecular hot spots” where most of the  
166 binding energy is associated with a limited number of interactions (Van Roey et al., 2014), we  
167 split D1<sub>22</sub> into two fragments, VP2<sub>281-290</sub> (APGGANQRTA) and VP2<sub>290-302</sub> (APQWMLPLLLGLY,  
168 henceforth referred to as D1<sub>min</sub>), and tested each fragment for binding to VP1. While no binding  
169 was observed for VP2<sub>281-290</sub> up to 10  $\mu$ M (data not shown), we observed similar binding affinity for  
170 the 13-mer peptide D1<sub>min</sub> as was observed for D1<sub>22</sub> (VP2<sub>290-302</sub>;  $K_D = 1.4 \pm 0.49$  nM,  $IC_{50} = 3.6 \pm 0.57$   
171 nM) (**Figure 1D, Table 1**). Hereafter, references to amino acid positions in D1<sub>min</sub> will be based on  
172 their sequence position in VP2.

173

174 **Alanine substitutions in D1<sub>min</sub> peptide reveal key residues contributing to D1<sub>min</sub>-VP1**

175 **interaction**

176 To identify key side-chain residues involved in the interactions of D1<sub>min</sub> with BKV VP1, we  
177 performed alanine scanning mutagenesis (Cunningham and Wells, 1989) on D1<sub>min</sub>, substituting  
178 one residue per peptide (**Figure 1B**), and analyzed the effect on binding to VP1 pentamers by  
179 Biacore SPR and the AlphaScreen competition assay (**Figure 1E; Table 1**). The SPR  $K_D$  and  
180 biochemical assay  $IC_{50}$  results are comparable for the alanine-substituted peptides (**Table 1**).  
181 Both assays identify residues W293, L297, and L298 as key determinants of high affinity binding,  
182 with each substitution causing ~600-1000 fold loss of affinity to VP1 ( $K_D = 920 \pm 190$  nM,  $1600 \pm 610$   
183 nM, and  $1000 \pm 160$  nM, respectively). Alanine substitution of other residues (M294, L295, L299,  
184 Y302) results in 40-60 fold loss of affinity ( $K_D$ ), demonstrating that these may also contribute to  
185 binding affinity.

186 To see if we could further reduce the size of the peptide required for high affinity binding, we  
187 evaluated rolling hexamer peptides of D1<sub>min</sub> in the AlphaScreen displacement assay (**Figure 1F;**  
188 **Table 1**). All hexamer peptides were significantly less potent relative to D1<sub>min</sub>. Notably, peptide  
189 D1<sub>min</sub> HEX4 (<sub>293</sub>WMLPLL<sub>298</sub>) contains all three key determinant residues and has an  $IC_{50}$  that is  
190 greater than 1000-fold higher than that of full-length D1<sub>min</sub> peptide. Rolling trimer peptides yielded  
191 similar results, showing greater than 1000-fold reductions in binding affinity to VP1 relative to the  
192 full-length D1<sub>min</sub> peptide (**Supplemental Table S2**). We conclude that the key D1<sub>min</sub> residues  
193 W293, L297, and L298 contribute significantly to the interaction of D1<sub>min</sub> and VP1; however,  
194 additional peptide residues are required for the highest affinity binding.

195

196 **Peptide D1<sub>min</sub> binds within the upper pore of VP1 pentamers**

197 In order to determine the location of binding of the D1<sub>min</sub> peptide to VP1 pentamers, protein-  
198 observed 2D-NMR spectroscopy was performed.  $^1H,^{13}C$ -HMQC spectra of  $^2H,^{12}C$ -BKV VP1<sub>30-297</sub>



199 with  $^1\text{H}$ ,  $^{13}\text{C}$  methyl-labeled residues Ile- (I), Leu- (L), Val- (V) and Thr- (T) were recorded in the  
200 absence and presence of increasing amounts of wild-type and W293A D1<sub>min</sub> peptides, and ligand-  
201 induced chemical shift perturbations (CSPs) and line broadening were monitored. To enable  
202 mapping of binding locations we obtained peak assignments for select methyl groups through a  
203 combination of amino acid point mutations and a 4D-NOESY-HSQC based methyl walk  
204 (Proudfoot et al., 2016).

205  
206 The NMR peaks assigned to BKV VP1 residues T224, T226, V231 (pro-*R* and pro-*S*), and V234  
207 (pro-*R* and pro-*S*) were greatly affected by the addition of the peptides (**Figure 2A**). These  
208 residues are in close proximity to each other, clustering in the upper pore of the VP1 pentamer  
209 (**Figure 2B**). Binding of peptides to the upper pore appears specific since the site can be saturated  
210 (no additional CSPs observed at higher peptide concentrations) and only certain VP1 residues  
211 show CSPs while the majority of signals remained unaffected. As the set of perturbed peaks and  
212 the directions of chemical shifts are the same for both the wild-type and the alanine-substituted  
213 peptide, it can safely be concluded that both ligands have the same binding pose. Interestingly,  
214 while the wild-type peptide induces strong line broadening of certain peaks at sub-stoichiometric  
215 ligand concentrations, an observation that can be attributed to slow exchange kinetics, the  
216 alanine-substituted peptide causes pure chemical shift changes, which are usually a sign of fast  
217 chemical exchange (**Figure 2A**, top right corner). These results are consistent with our SPR and  
218 biochemical assay data, which showed that the wild-type D1<sub>min</sub> peptide has a high affinity  
219 interaction with VP1 (low nanomolar  $K_D$ ) whereas the W293A peptide interacts with weaker affinity  
220 ( $K_D > 1 \mu\text{M}$ ).

221  
222 To validate the interaction of peptide D1<sub>min</sub> within the VP1 pore, we focused on three sets of  
223 residues proximal to the observed CSPs, P232, V234, and T224/T243, and tested D1<sub>min</sub> binding  
224 to VP1 proteins with substitutions at these residues using our AlphaScreen assay (**Figure C**). We

225 found that non-polar to polar substitution of either P232 or V234 lead to a substantial decrease in  
226 peptide binding relative to wild-type VP1 (P232S:  $1.3 \pm 0.26\%$ , V234S:  $1.6 \pm 0.32\%$  of wild-type  
227 signal). In contrast, a substitution that conserved the hydrophobicity of the putative binding site  
228 increased observed peptide binding (V234I:  $250 \pm 26\%$  of wild-type signal). Alanine substitution of  
229 VP1 pore residues further down into the pore (T224A/T243A) impact binding to a lesser degree  
230 ( $34 \pm 0.56\%$  of wild-type signal). Consistent X-ray structures of VP1 proteins with these  
231 substitutions do not appear to have any major structural rearrangements (**Supplemental Figure**  
232 **S2A-B**), consistent with previous reports of polyomavirus VP1 pore mutants (Nelson et al., 2015),  
233 and we observe normal pentamer formation of these VP1 variants by size-exclusion  
234 chromatography during purification (data not shown). These results are consistent with a specific  
235 interaction of peptide D1<sub>min</sub> within the upper pore of VP1 pentamers.

236

### 237 **NMR identifies second peptide binding site at the base of VP1**

238 At a wild-type D1<sub>min</sub> peptide concentration of 25  $\mu\text{M}$ , well above the low nanomolar  $K_D$  observed  
239 for the primary peptide binding site in the upper pore, we observed additional ligand induced CSPs  
240 and line broadening in the 2D NMR spectrum. The VP1 peaks that were affected upon addition  
241 of peptide and for which assignments were available are I45, T46, T118, T238, and T243  
242 (**Supplemental Figures S3A, S3B**). Without exception, these residues are located in the lower  
243 pore of the VP1 pentamer. Based on the first appearance of spectral changes at 25  $\mu\text{M}$  D1<sub>min</sub>  
244 peptide for a titration starting at 6.25  $\mu\text{M}$  (where no CSPs were observed), we estimate that the  
245  $K_D$  is greater than 250  $\mu\text{M}$ . For peptide D1<sub>min</sub> W293A, only at a ligand concentration of 100  $\mu\text{M}$   
246 did a few very weak additional peak shifts became visible; hence, the  $K_D$  value for this peptide is  
247 likely in the low single-digit millimolar range. At a wild-type peptide concentration of 50  $\mu\text{M}$  and  
248 higher the above-mentioned peaks as well as signals from amino acids located in the upper pore  
249 show significant line broadening (**Supplemental Figure S3C**). This observation can potentially

250 be explained by binding of multiple ligand copies or small soluble peptide aggregates. However,  
251 as the peptide induces signal perturbations of only certain VP1 residues all of which are in close  
252 proximity, the interaction site likely represents a binding hotspot. In line with this, the predicted  
253 location of the second interaction site is consistent with the modeled position of the D1 region of  
254 BKV VP2/3 in a recent cryo-EM structure (**Figure 2E**) (Hurdiss et al., 2018).

255

### 256 **X-ray model details interaction between D1<sub>min</sub> peptide and VP1 pore**

257 To further characterize the binding mode of D1<sub>min</sub> within the VP1 pore, a structurally guided model  
258 was generated using 2.36Å resolution X-ray data from 13-mer D1<sub>min</sub> peptide in complex with  
259 truncated VP1<sub>30-297</sub> pentamers (**Supplemental Table S3**). The VP1 pentamer model is in good  
260 agreement with a previously published BKV VP1 pentamer structure (PDB: 4MJ1; Neu et al.,  
261 2013) (RMSD: 0.85Å; **Supplemental Figure S3D**). Electron density for the peptide is observed  
262 in the upper third of the VP1 pentamer pore, consistent with the NMR binding data (**Figure 3A**,  
263 **Supplemental Figure S3C**). Refinement with a best-fit model of observed electron density maps  
264 yields a primary chain of density consistent with an  $\alpha$ -helical peptide running *N*-terminus at the  
265 top of the pentamer pore to *C*-terminus lower in the pore (**Figure 3B**), although electron density  
266 maps indicate multiple binding poses of the helix within the pore. VP1 pore residues that show  
267 peptide-induced CSPs by 2D NMR (T226, V231, V234; **Figure 2A-B**) as well as residues  
268 important for peptide binding as determined by substitution (P232, V234; **Figure 2C**) form a  
269 hydrophobic pocket around key D1<sub>min</sub> residues L297 and L298 (**Figure 3C**). Interestingly, pocket  
270 structure appears to be largely unaltered by ligand binding (**Supplemental Figure S3D**). In  
271 conclusion, our structurally-guided model of D1<sub>min</sub> in complex with VP1 agrees with NMR, alanine  
272 scan, and pore residue substitution studies placing the peptide in the upper pentamer pore and  
273 highlighting the importance of D1<sub>min</sub> residues L297 and L298, as well as VP1 residues T226, V231,  
274 P232, and P234 in peptide binding.

275

276 **D1<sub>min</sub> peptide is a potent anti-BKV inhibitor**

277 After observing high affinity binding of the D1<sub>min</sub> peptide to the VP1 pentamer pore, we asked  
278 whether the peptide could inhibit BKV infection in a cell-based infectivity assay. Primary renal  
279 proximal tubule epithelial (RPTE) cells were pre-treated with a titration of peptide for 2 hours then  
280 challenged with infectious BKV (isolate MM), with indirect immunofluorescent staining for large T-  
281 Antigen (TAg) measured 48 hours post-infection (h.p.i) as a readout for productive infection. We  
282 observed potent antiviral activity from D1<sub>min</sub> with a half-maximal effective concentration (EC<sub>50</sub>) of  
283 30±6.6 nM without observable cytotoxicity in the concentration range tested (**Figure 4A,B**).  
284 Importantly, single alanine-substituted peptides of D1<sub>min</sub> showed a loss of antiviral activity  
285 concordant with their loss of VP1 affinity in *in vitro* binding assays (W293A: >5000 nM, L297A:  
286 >5000 nM, Y302A: 280±51 nM).

287 As the VP1 pore region and VP2 D1 region are highly conserved between polyomaviruses  
288 (**Supplemental Figure S1**), we further tested D1<sub>min</sub> antiviral properties on the related human  
289 polyomavirus JCV. COS-7 cells were subjected to synchronized infection by either BKV or JCV  
290 (isolate MAD) followed by treatment with a titration of D1<sub>min</sub> peptide, with indirect  
291 immunofluorescent staining for VP1 measured 72 h.p.i as a readout for productive infection  
292 (**Figure 4C**). We observe similar EC<sub>50</sub> values for both polyomaviruses (BKV: 220 nM, JCV: 350  
293 nM), albeit roughly 10-fold higher than observed for BKV in the RPTE cell model. This is likely  
294 due to the higher viral titers required for infection of COS-7 cells, as we have observed a positive  
295 relationship between BKV titers and measured D1<sub>min</sub> EC<sub>50</sub> (data not shown).

296 A notable difference between infectious BKV virions and VP1 pentamers or virus-like particles  
297 (VLPs) containing only VP1 is the presence of minor structural proteins at the base of the VP1  
298 pentamer pore (Hurdiss et al., 2016). Based on the structural studies presented in **Figure 2,3**, the  
299 proposed mechanism of antiviral action by D1<sub>min</sub> is through binding of the peptide to the VP1 pore.  
300 To confirm that D1<sub>min</sub> peptide can bind to infectious BKV virions containing the minor structural  
301 proteins VP2 and VP3, we performed an affinity purification of biotinylated D1<sub>22</sub> in the presence

302 of VP1 moieties. Full-length VP1 pentamers, VLPs, or purified infectious BKV virions were  
303 incubated with 10-fold molar excess of either biotinylated or unlabeled D1<sub>22</sub>, followed by affinity-  
304 purification of biotinylated peptide and assaying co-purification of VP1. VP1 pentamers, VLPs,  
305 and infectious particles co-purified with D1<sub>22</sub>, demonstrating that the peptide can bind to infectious  
306 BKV virions (**Figure 4D**). Interestingly, only amino-terminal biotinylation was compatible with the  
307 assay; carboxy-terminal D1<sub>22</sub> was unable to co-purify VP1 pentamers or VLPs, even when tested  
308 with truncated VP1 pentamers (VP1<sub>30-297</sub>) and extended peptides (**Supplemental Figure S4**,  
309 **Supplemental Table S2**). These data are consistent with the X-ray structurally-guided model  
310 placing the *N*-terminus of the peptide at the top of the VP1 pore. We conclude D1<sub>min</sub> peptide can  
311 bind to infectious BKV virions that contain minor structural proteins at the base of VP1 pores.

312

### 313 **VP1 pore single-point mutants result in loss of BKV infectivity**

314 As the D1 region of VP2/3 contains the same amino acid sequence as D1<sub>min</sub>, we tested whether  
315 residues that mediate D1<sub>min</sub> binding to the VP1 pore are important for BKV infectivity. We  
316 performed site-directed mutagenesis of BKV *VP1* in the context of the viral genome, introducing  
317 substitutions at two key peptide binding residues in the VP1 pore, P232 and V234, and performed  
318 a spreading infection assay. Circularized wild-type or mutant BKV genomes were transfected into  
319 RPTE cells and productive, spreading infection was monitored by indirect immunofluorescent  
320 staining of expressed TAg over a time course of 3, 6, and 9 days post-transfection (d.p.t.) (**Figure**  
321 **4E**). We observe robust spreading infection for wild-type BKV by 9 d.p.t. In contrast, BKV was  
322 completely intolerant of all tested substitutions at P232, as well as substitution V234S. V234L did  
323 not appear to affect BKV infectivity, and V234I, which showed increased binding to biotinylated  
324 peptide in an AlphaScreen biochemical assay, exhibited an intermediate phenotype with  
325 incomplete inhibition of viral spread. Importantly, all mutant viruses expressed similar levels of  
326 VP1 to wild-type BKV (**Supplementary Figure S2C**), dismissing interpretations that the observed  
327 phenotypes are due to differences in VP1 expression. Next, we performed reciprocal site-directed

328 mutagenesis on BKV VP2/3 in the context of the viral genome and repeated the spreading  
329 infection assay (**Figure 4F**). While wild-type and mutant BKV all expressed TAg at similar levels  
330 3 d.p.t. after transfection, only wild-type BKV exhibited a spreading infection in culture. BKV was  
331 completely intolerant of VP2 or VP3 deletion, and of all tested alanine substitutions within the D1  
332 region of VP2/3, with no detectable infectious virus produced from these mutant genomes. This  
333 is despite observing no significant impact on VP2/3 expression levels in mutants VP2 W293A and  
334 VP2 L297A (**Supplemental Figure S2D**). We conclude that residues involved in the VP1-D1<sub>min</sub>  
335 interaction observed *in vitro* are required for productive BKV infection.

336

### 337 **D1<sub>min</sub> peptide requires interaction with BKV for activity, but does not block viral** 338 **endocytosis**

339 Past studies have utilized broadly acting inhibitors of cellular activities to interrogate the  
340 polyomavirus entry pathway (Goodwin et al., 2011; Moriyama and Sorokin, 2008; Ravindran et  
341 al., 2017; Schelhaas et al., 2007). Such studies have been coupled with time-of-addition assays,  
342 in which treatment with inhibitors is initiated at different times during infection to correlate an  
343 inhibitor mechanism of action with a particular stage of BKV entry, including endocytosis (Eash et  
344 al., 2004), endosome maturation and vesicular trafficking (Eash and Atwood, 2005; Jiang et al.,  
345 2009), and ERAD / proteasome activity (Bennett et al., 2013). Similarly, we conducted a time-of-  
346 addition assay to better characterize at which stage of the BKV entry pathway D1<sub>min</sub> antiviral  
347 activity occurs. RPTE cells were subjected to a synchronized infection at low multiplicity of  
348 infection (MOI) and inhibitor was added at varying times post-infection, with productive BKV  
349 infection assessed by indirect immunofluorescent staining of TAg expression at 48 h.p.i. (**Figure**  
350 **5A**). In addition to treatment with D1<sub>min</sub>, we treated infected cells with an anti-BKV neutralizing  
351 monoclonal antibody P8D11 (Abend et al., 2017) and cell-penetrating TAT-tagged modifications  
352 (Vives et al., 1997) of D1<sub>min</sub> which exhibit similar antiviral activity and biochemical potency to  
353 untagged D1<sub>min</sub> peptide (**Supplemental Table S2,S4**). We observe a nearly complete loss of

354  $D1_{\min}$  antiviral activity by 4 h.p.i. (**Figure 5B**), consistent with the timing of viral endocytosis (Eash  
355 et al., 2004). The BKV neutralizing antibody P8D11 parallels the time-dependent loss of activity  
356 of  $D1_{\min}$ . Cell-penetrating variants of  $D1_{\min}$  show delayed loss of activity compared to the  
357 unmodified peptide, with only an approximate 50% loss of activity at 4 h.p.i. and a gradual tapering  
358 off of activity in subsequent timepoints. For comparison, previous time-of-addition work using  
359 Brefeldin A and nocodazole, treatments which affect viral trafficking to the ER, showed efficacy  
360 against BKV until 10-12 h.p.i (Jiang et al., 2009).

361 After observing loss of  $D1_{\min}$  activity rapidly after initiating BKV infection in our time-of-addition  
362 study, we next asked whether  $D1_{\min}$  acts as a cell-binding antagonist by performing a cell binding  
363 assay. Briefly, RPTE cells were incubated with BKV pre-treated with  $D1_{\min}$  or P8D11 for 1 hour at  
364 4°C to block endocytosis. Cells were rinsed, immediately fixed, and we performed indirect  
365 immunofluorescent staining for cell-associated VP1 puncta as a readout for cell-bound virions  
366 (**Figure 5C**). We observed no effect on the number of cell-associated VP1 puncta in cells treated  
367 with  $D1_{\min}$  up to 5  $\mu\text{M}$  (>100-fold over observed  $\text{EC}_{50}$ ). In contrast, we observe loss of cell-  
368 associated VP1 puncta in the presence of the neutralizing antibody P8D11 treatment starting at  
369 concentrations >0.43 nM (>62 ng/mL), roughly the observed  $\text{EC}_{50}$  concentration. We conclude  
370 that  $D1_{\min}$  does not block binding of BKV to cells and the observations from the time of addition  
371 experiment are due to the inability of the peptide to permeate the cell membrane rather than the  
372 peptide inhibiting BKV adsorption. This model is consistent with the delayed loss of antiviral  
373 activity observed for cell-penetrating variants of  $D1_{\min}$ .

374

### 375 **$D1_{\min}$ activity occurs prior to BKV ER-to-cytosol retrotranslocation**

376 Next, we examined whether  $D1_{\min}$  treatment affects the ER-to-cytosol retrotranslocation of BKV,  
377 a critical entry step and distinguishing feature of polyomaviruses (Dupzyk and Tsai, 2016). This  
378 transition can be assayed by fractionation of infected host cells and testing for the presence of  
379 VP1 protein in the cytosolic fraction (Bennett et al., 2013; Inoue and Tsai, 2011). RPTE cells were

380 subjected to a synchronized BKV infection at high MOI followed by treatment of D1<sub>min</sub> peptide  
381 (wild-type and L297A) at 10-fold over EC<sub>50</sub> concentration. BKV VLPs were included as a negative  
382 control as they are unable to cross from the ER lumen into the cytosol (Geiger et al., 2011). At 24  
383 h.p.i, cells were harvested, partially permeabilized with digitonin, fractionated between  
384 supernatant (cytosol) and insoluble pellet (e.g. ER, nucleus), and subjected to reducing SDS-  
385 PAGE followed by immunoblotting to detect the presence of VP1 in each fraction (**Figure 5D**).  
386 We observe the presence of VP1 in the pellet fraction for all samples treated with VLP or BKV,  
387 indicating the virus (or VLP) has undergone endocytosis under all treatments. In contrast, we only  
388 observe the presence of VP1 protein in the cytosolic fraction for untreated or D1<sub>min</sub> L297A-treated  
389 BKV samples. Samples treated with wild-type D1<sub>min</sub> or lacking the minor structural proteins VP2/3  
390 (VLP) have no detectable VP1 protein in the cytosolic fraction, indicating the virus is unable to  
391 proceed through this step of the viral lifecycle.

392

### 393 **D1<sub>min</sub> peptide inhibits exposure of minor structural proteins during capsid disassembly**

394 During BKV entry, minor structural proteins which are initially concealed within the capsid become  
395 exposed, an event detectable by immunostaining (Norkin et al., 2002). Notably, inhibition of VP2/3  
396 exposure is indicative of improper trafficking or disassembly of the virus (Bennett et al., 2013).  
397 We asked if D1<sub>min</sub> affected this step of the BKV lifecycle. RPTE cells were subjected to a  
398 synchronized BKV infection at high MOI followed by treatment of D1<sub>min</sub> (wild-type and L297A) at  
399 10-fold over EC<sub>50</sub> concentration. At 24 h.p.i., cells were fixed and stained by indirect  
400 immunofluorescence against VP1 and VP2/3 (**Figure 5E**). To assess the ratio of infectious  
401 particles to total particles in the cells, we calculated the fraction of virion particles (VP1-stained  
402 puncta) that co-localized with VP2/3 stain (**Figure 5F**). We observe a pronounced loss of VP1 co-  
403 localized with VP2/3 in wild-type D1<sub>min</sub> treated cells as compared to our untreated control. In  
404 contrast, no change in co-localization between VP1 and VP2/3 is observed for treatment with the  
405 loss-of-function peptide D1<sub>min</sub> L297A. VP1 staining was consistent across all samples (**Figure**



406 **5G**). We conclude that treatment with D1<sub>min</sub> peptide results in virions that are unable to proceed  
407 through proper capsid disassembly that would result in the essential exposure of minor structural  
408 protein epitopes.

409

410

411

412

413

414

415

416

417

418

419

420

421

422

423

424

425

426

427

428

429

430

431

432

433

434

435 DISCUSSION

436

437 Polyomaviruses are the causative agents of multiple human diseases, and the lack of effective  
438 antiviral therapeutics for the treatment of polyomavirus infections and associated diseases  
439 represent an unmet medical need. To identify potential therapeutics for BK and JC  
440 polyomaviruses, we explored the potential of targeting the major capsid protein VP1, one of the  
441 few proteins expressed by members of the polyomavirus family. This strategy of antiviral agents  
442 targeting viral capsids has also been explored for HIV, dengue virus, picornaviruses, and hepatitis  
443 B virus (Blair et al., 2010; Byrd et al., 2013; De Colibus et al., 2014; Deres et al., 2003; Fox et al.,  
444 1986; Klumpp et al., 2018; Lamorte et al., 2013).

445 We report the first described anti-polyomavirus inhibitor that acts through a novel anti-  
446 polyomavirus mechanism of action by binding the viral capsid pore. The BKV VP2/3-derived  
447 peptide D1<sub>min</sub> binds specifically to major structural protein VP1 with high affinity (SPR  $K_D = 1.4$   
448 nM, biochemical  $IC_{50} = 3.6$  nM) and NMR-based studies place the peptide binding site within the  
449 upper pore of VP1 pentamers. An X-ray structurally-guided model and residue substitution studies  
450 corroborate the peptide binding site within the VP1 upper pore. Interestingly, our NMR studies  
451 uncovered a potential second, weaker peptide-binding site at the base of VP1 pentamers,  
452 consistent with the modeled position of VP2/3 D1 region in previously published polyomavirus  
453 structures (Chen et al., 1998; Hurdiss et al., 2018). In cell-based assays, treatment with D1<sub>min</sub>  
454 results in potent inhibition of BKV infection ( $EC_{50} = 30$  nM) and elicits activity against the related  
455 human polyomavirus JCV. Using time of addition and fractionation assays to dissect the BKV  
456 entry pathway, our studies indicate D1<sub>min</sub> mechanism of antiviral activity occurs sometime  
457 between endocytosis and retrotranslocation of the virus from the host cell ER into the cytoplasm.  
458 We can further refine the mechanism of action with the observation that D1<sub>min</sub> treatment blocks  
459 exposure of minor structure proteins VP2/3 during capsid disassembly.

460 Our MoA studies utilized several strategies to help identify the stage of the viral lifecycle impacted  
461 by D1<sub>min</sub> treatment. We performed an inhibitor time of addition experiment that reported D1<sub>min</sub>  
462 peptide acting very early in infection, concurrent with the timing of anti-BKV neutralizing antibody  
463 P8D11. However, in contrast to the neutralizing antibody, we clearly observed D1<sub>min</sub> peptide  
464 treatment did not affect BKV binding to host cells, indicating a mechanism distinct from P8D11.  
465 Furthermore, cell-penetrating TAT-fused D1<sub>min</sub> peptides continued to inhibit BKV infection at later  
466 addition time points as compared to the unmodified D1<sub>min</sub> peptide, implying the observed rapid  
467 loss of activity of the unmodified D1<sub>min</sub> peptide is likely due to cell impermeability rather than the  
468 timing of anti-BKV action. While observations for the TAT-tagged D1<sub>min</sub> peptides also imply  
469 disruption of the early stages of BKV infection (e.g. entry and trafficking), there are caveats to  
470 direct interpretation of these cell-penetrating peptide data. First, the concentration of intracellular  
471 TAT-tagged D1<sub>min</sub> peptide may be below the effective concentration required to inhibit infection  
472 when added at later time points post-infection, after the virus has been internalized. Second, the  
473 peptides may not localize to subcellular compartments where anti-BKV activity is required;  
474 previous studies on localization of TAT-tagged peptides and proteins demonstrate a predominant  
475 nuclear localization (Horton et al., 2008; Vives et al., 1997; Yang et al., 2002). Interestingly, not  
476 all small-molecule treatments that inhibit BKV entry result in the observed D1<sub>min</sub> phenotype of  
477 blocking exposure of VP2/3 epitopes. Treatment with the proteasome inhibitor epoxomicin results  
478 in increased observed VP2/3 staining (Bennett et al., 2013), the opposite phenotype of D1<sub>min</sub>  
479 treatment. Thus, blocking exposure of VP2/3 during viral entry may be specific to D1<sub>min</sub> and not a  
480 general phenotype of anti-BKV treatments.

481 We characterized the binding determinants of D1<sub>min</sub> as well as demonstrated binding specificity  
482 of the peptide to VP1 pentamers using alanine-scanning mutagenesis (Cunningham and Wells,  
483 1989; Lozano et al., 2017). We identified three key residues in D1<sub>min</sub> – W293, L297, and L298 –  
484 where single alanine substitutions resulted in ~1000-fold loss of binding affinity to VP1 as

485 measured in both an AlphaScreen competition assay and SPR studies. A structurally-guided  
486 model based on X-ray data acquired from VP1-D1<sub>min</sub> complexes details an  $\alpha$ -helical peptide  
487 binding in the upper VP1 pore, running *N*-to-*C* terminal from the top of the pore to the lower pore.  
488 Additionally, the model places key D1<sub>min</sub> residues L297 and L298 within a hydrophobic pocket  
489 formed by VP1 pore residues T226, V231, P232, and V234. We observe these residues  
490 experience CSPs by 2D NMR upon peptide binding to VP1 (except the unlabeled P232).  
491 Biochemical peptide binding assays with substitutions of VP1 pore residues P232 and V234, as  
492 well as BKV spreading infection studies with mutations at VP1 P232 or V234, confirm and validate  
493 both the 2D NMR data and structurally-guided model of the peptide binding in the VP1 pore.  
494 Studies of trimer and hexamer truncations of the 13-mer D1<sub>min</sub> peptide were unable to reconstitute  
495 high-affinity binding, including a hexamer peptide that contained the three key residues W293,  
496 L297, and L298, indicating these key residues are necessary but not sufficient for high affinity  
497 peptide binding to VP1. This may indicate that other residues likely contribute to peptide potency  
498 and/or the helical conformation of the peptide is important for its mode of binding. Peptides less  
499 than nine residues in length are unlikely to form secondary structures (Gellman, 1998; Manning  
500 et al., 1988). Accordingly, the high affinity binding of D1<sub>min</sub> to VP1 likely uses some combination  
501 of structural and sequence elements.

502 As the D1<sub>min</sub> peptide is derived from a native sequence found in the VP2/3 D1 region, and the  
503 peptide binds the VP1 pore with high affinity, intriguing questions are raised about the biology of  
504 the peptide and the pore to which it binds. Mutations in pore residues that are in close proximity  
505 to the peptide-binding site (VP1 P232, V234) generally result in noninfectious virus without grossly  
506 altering VP1 pentamer structure. Likewise, all tested mutations in the D1 region of BKV VP2/3  
507 resulted in noninfectious virus. Both pore residues that we have shown by multiple methods are  
508 important for peptide binding (VP1 T226, V231, P232, V234) and the D1 region of VP2/3 from  
509 which the D1<sub>min</sub> peptide is derived (VP2/3 290-302) are highly conserved across multiple

510 polyomaviruses (**Supplemental Figure S1**). Viral proteins are subject to rapid sequence change  
511 over time due to high viral genome mutagenesis rates unless maintained by purifying selective  
512 pressure (Daugherty and Malik, 2012; Duffy et al., 2008; Kistler et al., 2007; Tokuriki et al., 2009);  
513 polyomaviruses are no exception (Buck et al., 2016; Pastrana et al., 2013). Thus, conservation of  
514 viral protein sequences is a strong indication of biological relevance. Further to this point, studies  
515 with JCV show both high affinity peptide binding to VP1 and inhibition of infection at a similar  
516 potency ( $EC_{50}$ ) as BKV in COS-7 cells, suggesting a conserved mechanism across at least two  
517 polyomaviruses. Interestingly, a study of JCV VP1 pore mutants found a deficiency in VP2/3  
518 exposure (Nelson et al., 2015), corroborating our results with treatment of a pore-binding peptide.  
519 Both the conservation the residues in the VP1 pore and the VP2/3 D1 region that mediate  $D1_{min}$ -  
520 VP1 interaction, and convergence of phenotype between the VP1 pore mutations and VP2/3 D1  
521 region mutations, is suggestive that the peptide-binding site represents a previously  
522 uncharacterized VP2/3 binding site in the VP1 pore.

523 Multiple structures have been reported previously for infectious polyomavirus virions using both  
524 X-ray crystallography and cryo-electron microscopy (cryo-EM), with most reporting the minor  
525 structural proteins VP2/3 as a globular density at the base of the VP1 pentamer (Griffith et al.,  
526 1992; Hurdiss et al., 2016; Liddington et al., 1991). More recently, a cryo-EM structure of an  
527 infectious BKV virion mapped the resolved C-terminus of VP2/3, including the region containing  
528 the  $D1_{min}$  sequence, at the base of the VP1 pentamer (Hurdiss et al., 2018). These results are  
529 consistent with our current observations of a  $D1_{min}$  low affinity “second binding site” identified in  
530 the NMR studies.

531 An intriguing question is whether the high specificity and affinity of  $D1_{min}$  binding to VP1 is  
532 coincidental or reconstitutes an interaction between VP1 and the VP2/3 D1 region that occurs  
533 during the viral lifecycle. Dramatic restructuring of the viral capsid takes place during disassembly  
534 including reduction of intra-capsid disulfide bonds, decrease in virion size, and exposure of

535 previously hidden minor structural protein epitopes from the capsid core (Bennett et al., 2013;  
536 Geiger et al., 2011; Inoue and Tsai, 2011; Jiang et al., 2009; Magnuson et al., 2005; Norkin et al.,  
537 2002). Our BKV infection assays indicate that residues involved in D1<sub>min</sub> binding to the VP1 pore  
538 are critical for BKV infectivity. The low- and high-affinity D1<sub>min</sub> binding sites found at the base and  
539 in the upper pore of VP1 pentamers, respectively, may represent VP1-VP2/3 interactions during  
540 different stages of disassembly, and subsequent exposure of VP2/3 may be required to allow for  
541 essential viral-host protein interactions. For example, interaction of the VP2/3 NLS with importin  
542  $\alpha/\beta$  is required for efficient nuclear import of SV40 and BKV viral genomes during entry (Bennett  
543 et al., 2015; Nakanishi et al., 1996; Nakanishi et al., 2002). The process by which polyomaviruses  
544 decrypt masked VP2/3 protein-protein interaction domains via structural rearrangements may  
545 involve the translocation of VP2/3 D1 region from a low-affinity binding site at the base of VP1  
546 pentamers to the high-affinity binding site in the upper pore. Further studies are required to  
547 validate the proposed model, in particular studies that may deconvolute potential VP2/3  
548 interactions with the lower and upper VP1 pore.

549 The essential step of membrane penetration by non-enveloped viruses is an incompletely  
550 characterized process (Kumar et al., 2018). Polyomaviruses complete this lifecycle step by  
551 exploiting the host cell ER-associated degradation (ERAD) pathway to undergo retrotranslocation  
552 from the ER lumen into the cytosol (Dupzyk and Tsai, 2016). This process involves viral interaction  
553 with numerous host factors and requires the presence of VP2/3 (Bagchi et al., 2016; Bagchi et  
554 al., 2015; Dupzyk et al., 2017; Geiger et al., 2011; Inoue and Tsai, 2017). Treatment of BKV with  
555 D1<sub>min</sub> peptide inhibits two key observable lifecycle steps: exposure of VP2/3 epitopes to  
556 immunofluorescent staining and retrotranslocation of VP1 protein from the ER lumen into the  
557 cytosol. The MoA by which D1<sub>min</sub> elicits these antiviral phenotypes remains unclear. Of note is  
558 the observation that VP2/3 are required for retrotranslocation of virions out of the host cell ER  
559 lumen into the cytosol; VLPs (which lack minor structural proteins) are unable to complete this

560 entry step (Geiger et al., 2011; Inoue and Tsai, 2011). We envision a few, non-exclusive models  
561 for D1<sub>min</sub> antiviral action. D1<sub>min</sub> binding in the VP1 pore may block interactions with host factors  
562 that bind there directly. Indeed, a cryo-EM study of infectious BKV particles identified possible  
563 heparin binding to the upper VP1 pore (Hurdiss et al., 2018). Blocking host factor interactions  
564 could result in improper trafficking of the incoming virion or inhibit capsid processing. Previous  
565 studies have shown that small molecules that inhibit polyomavirus trafficking to the ER block  
566 exposure of VP2/3 (Bennett et al., 2013; Bennett et al., 2015). In a second model, binding of D1<sub>min</sub>  
567 peptide stabilizes the capsid and inhibits proper disassembly. The host restriction factor HD5 was  
568 shown to both inhibit VP2/3 exposure and stabilize the JCV capsid (Zins et al., 2014), suggesting  
569 that the two phenotypes may be related. Lastly, D1<sub>min</sub> may disrupt an essential interaction  
570 between the VP1 pore and VP2/3 via the D1 region. Deciphering which of these models is correct  
571 will require further investigation using proximity-based methodologies to assess interactions with  
572 host factors and assays to monitor capsid disassembly.

573 In conclusion, we identified the first antiviral agent against BK and JC polyomaviruses that  
574 specifically targets the VP1 pore – the thirteen residue peptide D1<sub>min</sub>. The peptide is derived from  
575 polyomavirus minor structural proteins VP2/3 D1 region, and NMR and X-ray studies show the  
576 peptide binds to a novel site within the pore formed by pentameric VP1 capsid protein. The  
577 biological relevance of the interaction between peptide and the VP1 pore was confirmed by  
578 mutagenesis of the viral genome, with cell-based viral proliferation assays being impacted by  
579 mutations within the VP2/3 D1 region or the corresponding binding region within the VP1 pore.  
580 These observations indicate the peptide-binding site may be biologically-relevant, potentially  
581 constituting a previously uncharacterized VP1-VP2/3 binding interface. Given the single-digit  
582 nanomolar binding affinity of D1<sub>min</sub> to the VP1 pore, the peptide provides a powerful new tool  
583 molecule for probing polyomavirus entry biology. Lastly, the inhibitory potential of the D1<sub>min</sub>-  
584 binding site within the VP1 pore first reported here may represent a novel target for development

585 of first-in-class antiviral therapies to address the unmet medical need presented by polyomavirus  
586 infections.

587

588

589

590

591

592

593

594

595

596

597

598

599

600

601

602

603

604



605 METHODS

606

607 **Cell culture.** Primary renal proximal tubule epithelial (RPTE) cells were purchased from ATCC  
608 (PCS-400-010) and cultured in RenaLife Basal Medium with supplements (Lifeline Cell  
609 Technology LL-0025) as previously described (Abend et al., 2007). COS-7 cells were purchased  
610 from ATCC (CRL-1651) and cultured in DMEM medium (Corning Cellgro 10-017-CV)  
611 supplemented with 5% fetal bovine serum (FBS) (Seradigm). HEK-293 cells were purchased from  
612 ATCC (CRL-1573) and cultured in DMEM medium (Corning Cellgro 10-017-CV) supplemented  
613 with 10% FBS (Seradigm). Cells were cultured at 37°C with 5% CO<sub>2</sub>.

614

615 **Virus stock generation.** BKV stocks were generated by transfection and infection of cells as  
616 previously described (Abend et al., 2007). Briefly, BKV ST1 MM viral genome was excised from  
617 pBR322 plasmid (ATCC 45026) using *Bam*HI (NEB), cleaned up using QIAquick PCR Purification  
618 Kit (Qiagen), and re-circularized using T4 DNA ligase (NEB) overnight at 16°C. The re-ligated  
619 viral genomes were extracted using phenol:chloroform:isoamyl alcohol (25:24:1,v/v) (Sigma) and  
620 aqueous phase was separated using Phase Lock Gel Heavy tube (5Prime), followed by ethanol  
621 precipitation and resuspension of viral genomes in Buffer EB (10 mM Tris-HCl, pH 8.5, Qiagen).  
622 HEK-293 cells were transfected with 2-4 µg of viral genome using Lipofectamine-2000 (Invitrogen)  
623 and Opti-MEM (Gibco) according to manufacturer's protocol, and cells were cultured for 10-14  
624 days until CPE were observed. Cells were freeze-thawed three times and supernatant cleared by  
625 centrifugation at 1600 rpm for 15 minutes. Low-titer virus from resulting supernatant was used to  
626 infect either RPTE or HEK-293, and cells were cultured for 12-14 days (RPTE cells) or 21-28 days  
627 (HEK-293 cells) until CPE was observed. Cells were then scrapped, freeze-thawed three times,  
628 and purified as described below.

629 JCV stocks were prepared similarly. The genome of JCV genotype Ia isolate Mad1 (GenBank  
630 Accession J02227) cloned into the pBR322 plasmid at the *EcoRI* restriction site (resulting  
631 construct: pM1TC) was a generous gift from Walter Atwood (Brown University). JCV stocks were  
632 produced by transfection and infection of cells similar to what has been previously described  
633 (Hara et al., 1998). Briefly, the viral genome was first extracted from the plasmid backbone by  
634 digestion with *EcoRI* (NEB) and re-circularized using T4 DNA ligase. . The resulting viral genomes  
635 were then purified using the QIAquick PCR Purification Kit (Qiagen) to prepare for transfection  
636 into cells. COS-7 cells, a cell line supportive of JCV replication (Hara et al., 1998), were seeded  
637  $1 \times 10^6$  cells per T75 flask and transfected with 2-4  $\mu\text{g}$  of viral genomes using Lipofectamine-2000  
638 (Invitrogen) and Opti-MEM (Gibco) according to manufacturer's protocol. Transfected cells were  
639 incubated at 37°C with 5% CO<sub>2</sub> for 4 hours, then transfection medium was replaced with infection  
640 medium (DMEM supplemented with 2% FBS and 1X Pen/Strep). Cells were cultured at 37°C with  
641 5% CO<sub>2</sub> for 6-10 weeks, until cytopathic effects (CPE) became evident. During this time, 2-3 mL  
642 fresh infection media was added every 3-4 days and cells were split by 1:2 to 1:3 dilution factors  
643 once a week to maintain cell health and prevent overcrowding. Upon observation of significant  
644 CPE, cells were collected by scraping, combined with culture media, subjected to three freeze-  
645 thaw cycles to release intracellular virus. These resulting viral stocks were titrated and stored at -  
646 80°C.

647

648 **Virus purification.** Purified BKV was prepared as previously described (Jiang et al., 2009).  
649 Briefly, crude lysate containing high-titer BKV was cleared by centrifugation at 3200 rpm for 30  
650 minutes at 4°C, and supernatant (S1) was separated from the resulting pellet. The pellet (P1) was  
651 resuspended in buffer A (10 mM HEPES, pH 7.9, 1 mM CaCl<sub>2</sub>, 1 mM MgCl<sub>2</sub>, 5 mM KCl). The  
652 resuspended pellet pH was lowered to 6.0 with 0.5 M HEPES (pH 5.4), and incubated with  
653 neuraminidase (1U/mL; Sigma) for 1 hour at 37°C. Pellet buffer pH was then raised pH 7.4 with

654 0.5 M HEPES (pH 8), and cleared by centrifugation at 16,000 x g for 5 minutes at 4°C. The  
655 resulting supernatant (S2) was pooled with the initial (S1), and the pellet (P2) was resuspended  
656 in buffer A containing 0.1% deoxycholate (Sigma), incubated for 15 minutes at room temperature,  
657 cleared by centrifugation at 16,000xg for 5 minutes at 4°C, and the resulting supernatant (S3) was  
658 pooled with the other supernatant fractions. Pooled supernatants were placed over a 4 mL 20%  
659 (w/v) sucrose solution and centrifuged at 83,000 x g for 2 hours at 4°C in a SW32Ti rotor  
660 (Beckman). The resulting pellet was resuspended in 2 mL buffer A, and placed over a CsCl gradient  
661 from 1.2-1.4g/cm<sup>3</sup> in buffer A generated using a J17 gradient former (Jule, Inc.), and centrifuged  
662 at 35,000 rpm for 16 hours at 4°C in an SW41 rotor (Beckman). The BKV band formed in the  
663 gradient was collected using an 18-gauge needle, and dialyzed in a Slide-A-Lyzer Dialysis  
664 Cassette, 10K MWCO (ThermoFisher Scientific) over 2 days in 2L buffer A at 4°C, with buffer  
665 exchanged once during dialysis. BKV was then aliquoted and stored at -80°C.

666

667 **Antibodies and reagents.** The following primary antibodies were used in this study: monoclonal  
668 mouse anti-SV40 T-antigen (PAb416, EMD Millipore;) at 1:200 for immunofluorescent staining  
669 (IF), monoclonal mouse anti-BKV VP1 antibody (in-house generated) at 1:500 for IF, polyclonal  
670 rabbit anti-SV40 VP1 (Abcam) at 1:500 for IF and 1:1000 for immunoblotting (IB), polyclonal rabbit  
671 anti-SV40 VP2/3 (Abcam) at 1:1000 for IF and 1:1000 for IB, polyclonal rabbit anti-BiP (Abcam)  
672 at 1:750 for IF and 1:1000 for IB, and monoclonal mouse anti-HSP90 (Abcam) at 1:1000 for IB.  
673 The following secondary antibodies were used in this study: in IF applications, goat anti-mouse  
674 IgG conjugated to either Alexa Fluor 488, 594, or 647 (ThermoFisher Scientific), goat anti-rabbit  
675 IgG conjugated to either Alexa Fluor 488 or 594 (ThermoFisher Scientific); in IB applications, goat  
676 anti-mouse IgG conjugated to IRDye 680RD (Li-COR), goat anti-rabbit IgG conjugated to IRDye  
677 800CW (Li-COR). The human anti-BKV VP1 IgG1 antibody P8D11 was produced by the Novartis  
678 Institutes for BioMedical Research Biologics Center. D1<sub>min</sub>, D1<sub>min</sub> W293A, D1<sub>min</sub> L297A, D1<sub>min</sub>

679 Y302A, and biotin-peptide probe for the biochemical assay were synthesized and HPLC-purified  
680 by the Tufts University Core Facility with purity  $\geq 90\%$ . TAT-tagged D1<sub>min</sub> peptides were  
681 synthesized by CPC Scientific. All other peptides were synthesized by the Sigma Chemical  
682 Company. Purity was determined by LCMS to be 35-74%.

683

684 **Immunofluorescent staining.** For T-antigen staining, cells were fixed with 4% paraformaldehyde  
685 (w/v) in PBS for 15 minutes, then incubated with primary antibody in 0.2% gelatin, 0.1% Triton X-  
686 100 in PBS for 1 hour, followed by incubated with secondary antibody at 1:3000 and 4',6-  
687 diamidino-2-phenylindole (DAPI, Calbiochem) contrast stain at 1.67  $\mu\text{g}/\text{mL}$  in 0.2% gelatin in PBS  
688 for 1 hour. For VP1 co-localization and cell-binding assays, cells were fixed with 4%  
689 paraformaldehyde (w/v) in PBS for 15 minutes then permeabilized with 0.1% Triton X-100 in PBS  
690 for 10 minutes. Cells were then blocked with 2% goat serum (Invitrogen) for 30 minutes, then  
691 incubated with primary antibodies for 1 hour, and secondary antibodies for 1 hour, followed by a  
692 10 minute incubation with DAPI contrast stain at 1.67  $\mu\text{g}/\text{mL}$  (Calbiochem). For VP2/3 staining,  
693 cells were fixed in 100% methanol for 15 minutes at  $-20^{\circ}\text{C}$  then blocked in 3% nonfat milk (Bio-  
694 Rad), 0.1% Tween-20 (Bio-Rad) in PBS for 30 minutes. Cells were then incubated with anti-VP1  
695 and anti-VP2/3 antibodies for 1 hour, and secondary antibodies for 1 hour, followed by a 10 minute  
696 incubation with DAPI contrast stain at 1.67  $\mu\text{g}/\text{mL}$ .

697

698 **Infections.** Viral titers were measured by fluorescent focus assay, as previously described (Jiang  
699 et al., 2009). For 96-well plate format assays, RPTE cells were seeded 12,000 per well. For ER-  
700 to-cytosol retrotranslocation assays, RPTE cells were seeded in 6-well plates at 380,000 cells per  
701 well. For non-synchronized infections of RPTE cells, virus was diluted in RenaLife medium and  
702 added to cells followed by incubation at  $37^{\circ}\text{C}$  for the desired time. For synchronized infections,  
703 cells were pre-chilled to  $4^{\circ}\text{C}$  for 15 minutes. Purified virus was diluted into cold RenaLife medium

704 and incubated with cells for 1 hour at 4°C. Cells were rinsed once with cold RenaLife medium,  
705 followed by addition of warm medium and incubation at 37°C for the desired time. For COS-7 cell  
706 assays, cells were seeded 5,000 per well in a 96-well plate format. COS-7 cells were infected  
707 using a synchronized infection protocol as described above, with the following modifications: JCV  
708 or BKV were diluted into low-serum medium (DMEM supplemented with 2% FBS), and cells were  
709 rinsed with cold low-serum medium and cultured in low-serum medium at 37°C for the desired  
710 time.

711 Spreading infection assays were performed as follows. Re-circularized BKV genomes were  
712 prepared as described. RPTE cells were reverse-transfected with 100 ng viral genome DNA using  
713 Lipofectamine 3000 (Invitrogen) at a 1.5:1 ratio of L3000 to DNA, and Opti-MEM (Gibco) in a 96  
714 well-plate format. Medium was exchanged the following day, and plates were incubated at 37°C  
715 for the desired time.

716

717 **Preparation of BKV mutants.** Mutant BKV genomes were prepared using PCR site-directed  
718 mutagenesis using the primers listed below.

| Name  | Forward primer (5'-to-3')        | Reverse primer (5'-to-3')        |
|-------|----------------------------------|----------------------------------|
| VP1   | caggaggggaaaatgttTCccagtactt     | cacatgaagtactggGGAaacatthttccc   |
| P232S | cat                              | ctcctg                           |
| VP1   | caggaggggaaaatgttCTCccagtactt    | cacatgaagtactggGAGAaacatthttccc  |
| P232L | cat                              | ctcctg                           |
| VP1   | caggaggggaaaatgttATCccagtactt    | cacatgaagtactggGATAaacatthttccc  |
| P232I | cat                              | ctcctg                           |
| VP1   | gaaaatggtcccccaTCActtcatgtgac    | gtggttggtcacatgaagTGAtgggggaac   |
| V234S | caac                             | att                              |
| VP1   | gaaaatggtcccccaTTActtcatgtgac    | gtggttggtcacatgaagTAAAtgggggaac  |
| V234L | caac                             | att                              |
| VP1   | gaaaatggtcccccaATActtcatgtgac    | gtggttggtcacatgaagTATtgggggaac   |
| V234I | caac                             | att                              |
|       | gtatttccaggttcatAggtgctgctctagca | gagcagcaccTatgaacctggaaatacaaaaa |
| ΔVP2  | cttttgggggac                     | aaaagggttac                      |
|       | gcaatcaggcatAgctttggaattgtttaacc | ccaaagcTatgcctgattgctgatagaggcct |
| ΔVP3  | cagatgagtac                      | acagtggaaac                      |
| VP2   | caaagaactgctGctcaatggatggtgccttt | catccattgagCagcagttctttgattagcac |
| P291A | acttctaggcc                      | ctcctgg                          |

|       |                                   |                                   |
|-------|-----------------------------------|-----------------------------------|
| VP2   | ctgctcctcaaGCgatgttgccctttacttcta | ggcaacatcGCttgaggagcagttcttttgatt |
| W293A | ggcctgtac                         | agcacctcc                         |
| VP2   | gatgttgccctGCacttctaggcctgtacggga | caggcctagaagtGCaggcaacatccattgag  |
| L297A | ctgtaacac                         | gagcagttc                         |
| VP2   | ctaggcctgGCcgggactgtaaacacctgctct | gttacagtcccgcGCcaggcctagaagtaaagg |
| Y302A | tgaagcatg                         | caacatccattg                      |

---

719

720 After PCR, reactions were treated with *DpnI* (NEB) to remove template DNA, and PCR products  
721 were used to transform XL10-Gold (VP1 mutants, Agilent) or 10-beta cells (VP2 mutants, NEB).  
722 Resultant colonies were sequenced and analyzed for desired mutation, and viral genomes were  
723 prepared as described. Point mutations lead to amino acid substitutions in VP2 and VP3. Deletion  
724 mutants were obtained by point mutation of the start codon. While  $\Delta$ VP2 did not affect VP3  
725 sequence,  $\Delta$ VP3 resulted in a M120I substitution in VP2. BKV  $\Delta$ VP2 $\Delta$ VP3 genome was generated  
726 by successive rounds of site-directed mutagenesis with  $\Delta$ VP2 and  $\Delta$ VP3 primer sets.

727

728 **Inhibitor treatments.** Dose-response curves were determined using 3-fold, 10-point titrations of  
729 inhibitor. For peptide  $EC_{50}$  determination, cells were treated with inhibitors for two hours prior to  
730 infection. For synchronized infection treatments, inhibitors were added immediately following  
731 synchronization;  $EC_{50}$  concentration for P8D11 was determined using the synchronized treatment  
732 protocol.  $CC_{50}$  values were determined using a CellTiter-Glo luminescent cell viability assay  
733 (Promega) after two days of treatment, with luminescence detected on a PHERAstar FS (BMG  
734 Labtech).

735

736 **Cell-binding assay.** Purified infectious BKV virions were incubated with titrated concentrations  
737 of D1<sub>min</sub> peptide or P8D11 antibody for 1 hour at 4°C in RenaLife medium. RPTE cells seeded in  
738 96-well plate format were cooled for 15 minutes at 4°C, and medium containing virus and inhibitor

739 mix was added to cells and incubated for 1 hour at 4°C. Cells were rinsed with cold RenaLife  
740 medium, and proceeded to fixation and staining as described.

741

742 **Time of addition assay.** RPTE cells seeded in 96-well plate format were subjected to a  
743 synchronized infection at low MOI (MOI = 0.3). Timepoint 0 h.p.i. samples were treated with  
744 inhibitor compounds immediately after synchronized infection, others added at the timepoint  
745 indicated. Inhibitors were used at the following concentrations: D1<sub>min</sub>, D1<sub>min</sub>-TAT, TAT-D1<sub>min</sub>, 0.8  
746 μM; P8D11, 0.014 μM (2 μg/mL). Plates were incubated at 37°C and fixed at 48 h.p.i.

747

748 **Fractionation assay.** RPTE cells were cultured in 2 wells in 6-well format per treatment. Cells  
749 were subjected to synchronized infection at high MOI (MOI = 10), and treated with 5 μM peptide  
750 immediately after synchronized infection. Cells were harvested 24 h.p.i. with 0.05% trypsin, 0.02%  
751 EDTA (Lifeline Cell Technology) for 2 minutes until cells were detached. Trypsin was inhibited  
752 with an equal volume of Trypsin Neutralizing Solution (Lifeline Cell Technology), and wells rinsed  
753 with phosphate-buffered saline (PBS). Cells were pelleted at 90 x g for 5 minutes at 4°C, and  
754 rinsed with 1 mL cold PBS buffer. Cell pellets were then lysed in 50 μl HNF buffer (150 mM  
755 HEPES pH 7.2, 50 mM NaCl, 2 mM CaCl<sub>2</sub>) containing 0.025% digitonin (Thermo Lifesciences)  
756 and 1X cOmplete™, Mini Protease Inhibitor Cocktail (Roche) for 10 minutes on ice. Lysates were  
757 then clarified with a 21,100 x g centrifugation at 4°C for 10 minutes. The supernatant (cytosolic  
758 fraction) was removed and the pellet was rinsed with 1 mL HNF buffer and transferred to a fresh  
759 tube, and pelleted again at 21,100 x g centrifugation at 4°C for 10 minutes. Pellets were then  
760 resuspended in sample buffer directly in sample buffer. Samples were boiled at 95°C for 10  
761 minutes then stored at -20°C until subjected to SDS-PAGE and immunoblotting.

762

763 **Immunoblotting.** Samples were prepared in sample buffer (NuPAGE LDS Sample Buffer  
764 (Invitrogen), 100 mM dithiothreitol (DTT)), boiled for 5 minutes at 95°C, and subjected to SDS-  
765 PAGE using 4-12% Bis-Tris Bolt gels (Invitrogen) in MOPS running buffer (Invitrogen). Proteins  
766 were transferred to Immobilon-FL PVDF membrane (Millipore) in transfer buffer containing 1X  
767 NuPAGE transfer buffer (Invitrogen), 20% methanol, and 0.05% SDS for 70 minutes. Membranes  
768 were blocked using Odyssey blocking buffer (TBS) (Li-COR) for 30 minutes at room temperature,  
769 and incubated with primary antibody diluted in Odyssey blocking buffer containing 0.05% Tween  
770 20 overnight at 4°C. Membranes were rinsed three times with Tris-buffered saline (TBS)  
771 containing 50 mM Tris-HCl, pH 7.4, 150 mM NaCl, and 0.1% Tween 20 (TBS-T), and incubated  
772 with secondary antibodies for 1 hour at room temperature. Membranes were again rinsed three  
773 times with TBS-T and once with TBS containing no detergent, and membranes were immediately  
774 scanned using an Odyssey Infrared Imager (Li-COR).

775

776 **Imaging and image segmentation.** Images were acquired on an ImageXpress Micro XLS  
777 system (Molecular Devices) with a 10x objective for assays determining percent infected cells  
778 (Nikon CFI Plan Fluor, MRH00101), or a 60x objective for all other assays (Nikon 60X Plan Apo  
779  $\lambda$ , MRD00605). Images were processed using CellProfiler version 2.1.2 (Kamentsky et al., 2011).

780

781 **Data analysis.** EC<sub>50</sub> values were calculated using XLFit v5.5.0.5 (IDBS). Quantification and  
782 processing of data generated by CellProfiler was performed using R v3.5.1 (R Core Team, 2018).  
783 Microscopy data was quantified per field of view, averaged per well, and data displayed as the  
784 mean value  $\pm$  SD across replicate wells. Immunoblot images were processed using Fiji built on  
785 ImageJ v1.52b (Schindelin et al., 2012).

786



787 **VP1 plasmid construction.** Synthetic DNA, codon optimized for Sf9 cell expression, encoding  
788 full-length BKV serotype 1 VP1 and JCV VP1 were generated for expression of VP1 proteins. For  
789 VLP production, DNA fragments encoding full length VP1 were inserted into the pFastBac1  
790 plasmid and baculovirus was generated following the Bac-to-Bac method (Invitrogen). For VP1  
791 pentamer production, DNA fragments encoding either BKV VP1 residues (2-362), JCV VP1  
792 residues (2-354), or BKV VP1 residues (30-297) were inserted into a gateway adapted pGEX  
793 plasmid for expression in *E. coli* with an N-terminal GST-6xHis-Tev tag. The mutations P232S,  
794 V234S, and T224A/T243A were introduced into the BKV VP1<sub>30-297</sub> plasmid by QuikChange site-  
795 directed mutagenesis.

796

797 **VP1 pentamer production.** BL21 Star (DE3) *E. coli* cells were transformed with expression  
798 plasmids and plated on LB agar plates supplemented with 100 µg/ml carbenicillin. Cell were  
799 grown in Terrific broth (supplemented with 15 mM sodium phosphate pH 7.0, 2 mM MgCl<sub>2</sub>, 100  
800 µg/ml carbenicillin) with shaking at 37°C until the OD<sub>600</sub> reached 0.7, the temperature was then  
801 lowered to 18°C, and Isopropyl β-D-1 thiogalactopyranoside (IPTG) added to 0.5 mM. After 16  
802 hours, harvested cells by centrifugation and stored at -80°C. Cells were re-suspended in chilled  
803 lysis buffer (25 mM Tris-HCl pH 8.0, 200 mM NaCl, 5% glycerol, 1 mM Tris(2-carboxyethyl)  
804 phosphine (TCEP), 15 mM Imidazole, 1X Roche complete EDTA-free protease inhibitor cocktail,  
805 1X Pierce universal nuclease) at a ratio of 5 mL buffer per gram of cell paste. Cells were lysed  
806 by passing through an M-110P microfluidizer at 17,500 PSI, on ice. The lysate was centrifuged  
807 at 26,800 x g for 45 minutes at 4°C. Equilibrated 10 mL Nickel sepharose Fast Flow (GE) column  
808 in lysis buffer and loaded clarified lysate. Washed resin with 3 column volumes (CV) of lysis  
809 buffer. Washed resin with 5 CV of wash buffer (25 mM Tris-HCl pH 8.0, 200 mM NaCl, 1 mM  
810 TCEP, 40 mM Imidazole, 5% glycerol) and VP1 was eluted with 2 CV elution buffer (25 mM Tris-  
811 HCl pH 8.0, 200 mM NaCl, 1 mM TCEP, 250 mM Imidazole, 5% glycerol). The N-terminal tag  
812 was removed by cleavage with Tev protease and pentamers were loaded onto a Superdex 200

813 column equilibrated in SEC buffer (25 mM Tris-HCl pH 8.0, 100 mM NaCl, 1 mM TCEP, 5%  
814 glycerol). Pooled peak fractions and concentrated using a 50,000 MWCO Amicon concentrator.

815

816 **Labeled VP1 pentamer production.** BL21 Star (DE3) E.coli cells transformed with VP1  
817 expression plasmid were grown in M9 minimal media (6 g/L Na<sub>2</sub>HPO<sub>4</sub>, 3 g/L KH<sub>2</sub>PO<sub>4</sub>, 0.5 g/L  
818 NaCl, 2 mM MgSO<sub>4</sub>, 0.1X Vitamins (Sigma R7256), 1 g/L <sup>15</sup>NH<sub>4</sub>Cl, 3 g/L glucose, 100 µg/mL  
819 carbenicillin, 0.1X trace metals) made up in D<sub>2</sub>O. Cells were incubated at 37°C with shaking at  
820 250 RPM until the OD<sub>600</sub> reached ~0.7. To each liter of culture added 70 mg of 2-Ketobutyric  
821 acid-4-<sup>13</sup>C,3,3-d<sub>2</sub> sodium salt hydrate, 120 mg of 2-Keto-3-methyl-<sup>13</sup>C-butyric-4-<sup>13</sup>C, 3-d acid  
822 sodium salt, 100 mg deuterated glycine, and 100 mg L-threonine (4-<sup>13</sup>C;2,3-D<sub>2</sub>). After 1 hour, the  
823 temperature was lowered to 24°C and IPTG was added to 250 µM. After 16 hours, cells were  
824 harvested by centrifugation and stored at -80°C. VP1 pentamers were purified as described  
825 above with the exception of the SEC buffer being 50 mM Na-Phosphate pH 7.0, 100 mM NaCl.

826

827 **VLP production.** Recombinant baculovirus encoding untagged full length BKV VP1 or JCV VP1  
828 were used to infect Sf9 insect cells in suspension at 1.5 million cells/mL, the cells were incubated  
829 at 27°C with shaking at 120 RPM for 72 hours then harvested by centrifugation and stored at -  
830 80°C. Cells were re-suspended in lysis buffer (20 mM Tris-HCl pH 7.5, 1 M NaCl, 1X Roche  
831 EDTA free protease inhibitor cocktail) at a ratio of 10 mL lysis buffer per gram of cell pellet and  
832 lysed by sonication on ice then the lysate was centrifuged at 16,000 x g for 20 minutes at 4°C.  
833 The supernatant was layered onto 3ml of 40% glucose made up in 1X PBS and centrifuged at  
834 116,000 x g for 2.5 hours at 4°C. Dissolved pellet in IEX buffer A (25 mM Tris-HCl pH 8.0, 25 mM  
835 NaCl) and loaded onto a 10 mL Sepharose Q-HP (GE) column equilibrated in IEX buffer A.  
836 Washed column with 3CV IEX buffer A and eluted with a linear NaCl gradient from 25 mM to 700  
837 mM NaCl across 25 CV. Pooled peak fractions and loaded onto 10 mL Capto Core 700 (GE)  
838 resin equilibrated in SEC buffer (25 mM Tris-HCl pH 8.0, 100 mM NaCl) collecting the flow-through

839 fraction. Loaded onto a Sephacryl S500 26/60 column (GE) and collected peak fractions,  
840 concentrated with a 100,000 MWCO Amicon concentrator.

841

842 **Protein reagents.** The following VP1 sequence was used for the biochemical AlphaScreen  
843 assays:

844 > BKV serotype 1 VP1 (30-297)

845 GKGGVEVLEVKTGVD AITEVEECFLNPEMGDPDENLRGFSLKLSAENDFSSDSPERKMLPCYSTAR I PLPN

846 LNEDLTCGNLLMWEAVTVQTEVIGIT SMLNLHAGSQKVHEHGGGKPIQGSNFHFFAVGGDPLEMQVLMN

847 YRTKYPEGTITPKNPTAQSQVMNTD HKAYLDKNNAYPVECWI PDPSRNENTRYFGTFTGGENVPPVLHVT

848 NTATTVLLDEQGVG PLCKADSLYVSAADICGLFTNSSGTQQWRGLARYFKIRLRKRSVK

849

850 The following VP1 sequence was used for SPR assays:

851

852 >BKV serotype 1 VP1 (2-362)

853 GAPTKRKGECPGAAPKKPK EPVQVPKLLIKGGVEVLEVKTGVD AITEVEECFLNPEMGDPDENLRGFSLKL

854 SAENDFSSDSPERKMLPCYSTAR I PLPNLNEDLTCGNLLMWEAVTVQTEVIGIT SMLNLHAGSQKVHEHG

855 GGKPIQGSNFHFFAVGGDPLEMQVLMN YRTKYPEGTITPKNPTAQSQVMNTD HKAYLDKNNAYPVECWI

856 PDPSRNENTRYFGTFTGGENVPPVLHVTNTATTVLLDEQGVG PLCKADSLYVSAADICGLFTNSSGTQQW

857 RGLARYFKIRLRKRSVKNPYPISFLLSDLINRRTQRVDGQPMYGMESQVEEVRVFDGTERLPGDPMIRY

858 IDKQGQLQTKML

859

860 **Chemical attachment of biotin to VP1 proteins.** For SPR analysis, biotin was covalently  
861 attached to VP1(2-362) with the sulfo-N-hydroxysuccinimide (NHS) ester of a biotin derivative  
862 (ThermoFisher Scientific # 21338) as follows: To a 1500 µl of a solution of BKV VP1 (2-362)  
863 protein at 17 µM in PBS buffer containing 1 mM TCEP was added 8 µl of a 1 mg/mL (1.5 mM)  
864 solution of sulfo-NHS-LC-LC-biotin in water. The solution was mixed with a vortex mixer briefly

865 (1 second), and incubated at room temperature for one hour. The solution was transferred to a  
866 ThermoFisher Slide-A-Lyzer dialysis cassette (3.5 kDa molecular weight cut-off, 3 mL) and  
867 dialyzed extensively against 3 times 2 liters of PBS buffer containing 1 mM TCEP at 4°C for 18  
868 hours.

869

#### 870 **Analysis of peptide:VP1 interactions by surface plasmon resonance**

871 SPR analysis for the determination of the dissociation constant  $K_D$  was performed with a Biacore  
872 T200 instrument with PBS buffer containing 1 mM TCEP, 0.05% Tween-20 (or P20, GE  
873 Healthcare) and 1 mM ethylenediaminetetraacetic acid (EDTA) at 20°C. The flow rate was 60  $\mu$ l  
874 per minute. VP1<sub>2-362</sub> protein covalently modified with biotin was loaded onto a streptavidin-coated  
875 Biacore biosensor (GE Healthcare Series S Sensor Chip SA, catalog BR-1005-31) that had been  
876 pre-treated with 50 mM sodium hydroxide containing 1 M sodium chloride. The protein loading  
877 response was 6000-8000 resonance units. Peptides were analyzed using the single cycle kinetics  
878 method according to instrument control software instructions. Data were analyzed using Biacore  
879 Evaluation Software to generate affinity constants ( $K_D$ ).

880

881 **AlphaScreen competitive binding assay.** The assay was run in a Tris buffer at pH 7.5  
882 containing 100 mM NaCl, 0.01% Tween 20, 1 mM EDTA and 0.01% bovine serum albumin. The  
883 D1<sub>22</sub> biotin-peptide probe with the sequence [H]-APGGANQRTAPQWMLPLLLGLYG-  
884 GGGK(Biotin)-[OH] was incubated with BKV VP1<sub>30-297</sub> for 90 minutes before addition of an anti-  
885 BKV VP1 antibody (in-house generated) along with AlphaScreen streptavidin donor and protein  
886 A acceptor beads (PerkinElmer). Samples were incubated overnight before reading on a  
887 PerkinElmer Envision. Untagged peptides were assessed in a competition mode where they were  
888 serially diluted in assay buffer and added to the VP1 along with the biotin-peptide probe. Peptide  
889 IC<sub>50</sub> values (n=3) were calculated in Microsoft Excel using XLfit.

890

891 **Co-crystallization of BKV VP1 pentamer with D1<sub>min</sub>.** For co-crystallization, 13-mer D1<sub>min</sub>  
892 peptide was added to the protein to a final concentration to ratio of 5:1 D1<sub>min</sub> to pentamer. The  
893 resulting mixture was incubated on ice for 1 hour and was concentrated to 15 mg/mL protein  
894 overall. Prior to crystallization, the mixture was passed through a 0.2-micron filter. The protein-  
895 peptide complex was crystallized using the hanging drop vapor diffusion method. 2.0  $\mu$ L of protein  
896 solution was mixed with 2.0  $\mu$ L of well solution, which consisted of 20% PEG-3350, 5% ethylene  
897 glycol, 0.1 M Tris buffer pH 8.5, 10 mM TCEP. The resulting drop was suspended over a reservoir  
898 of 0.3 mL well solution. The crystals grew at 18°C for approximately 12-24 hours. Crystals were  
899 washed briefly in a cryoprotectant consisting of 80% well and 20% ethylene glycol (v/v) and then  
900 flash-frozen in liquid nitrogen prior to data collection.

901 **Structure solution and refinement of BKV VP1 pentamer:D1<sub>min</sub> complex.** The X-ray diffraction  
902 data was collected at a wavelength of 1.54187Å and a temperature of 100°K on a Rigaku FRE+  
903 anode utilizing a Decris 300K Pilatus detector. Data integration and scaling were performed by  
904 using the autoPROC implementation of XDS and AIMLESS (Vonrhein et al., 2011). The structure  
905 of the complex was solved via Molecular Replacement using the CCP4i Suite implementation of  
906 PHASER (McCoy et al., 2007; Winn et al., 2011). The structure was built and refined via  
907 alternating rounds of real-space rebuilding in Coot and refined using autoBuster (Global Phasing)  
908 until convergence was reached. Data reduction and structure refinement statistics are presented  
909 in **Supplemental Table S3**. After attempts to refine the D1<sub>min</sub> model to convergence, with suitable  
910  $\phi/\psi$  angles as defined by the Ramachandran plot and suitable rotamers, it became clear that a  
911 single binding model could not account for the electron density seen in 2Fo-Fc maps. A model  
912 that rationalized the electron density was achieved by fitting the peptide with an occupancy of 0.8.  
913 Subsequent reciprocal space and real-space refinement of this model led to a suitable fit of the  
914 peptide into the observed density and reduced, but still unaccounted for, difference density for  
915 the remaining symmetry-related binding modes, which are not fit. As such, the co-structure is

916 presented as a model constructed using the observed density, or a “structurally-guided model.”  
917 Alignment of structurally-guided model with apo BKV pentamer X-ray structure (PDB: 4MJ1; Neu  
918 et al., 2013) was performed using the align tool in PyMOLv2.2.3 (Schrödinger, LLC) with a 10Å  
919 cutoff for outliers. Post-alignment, RMSD values were calculated using the tool rms\_cur without  
920 refitting the alignment.

921  
922 **NMR spectroscopy.** All NMR experiments were performed on a Bruker Avance III 600 MHz  
923 spectrometer equipped with a 5 mm z-gradient QCI-F cryo probe. The temperature in all  
924 experiments was 32°C (305K). The NMR samples were prepared in 160 µL PBS buffer at pH 7.5,  
925 containing 2 mM deuterated DTT, 10% (v/v) D<sub>2</sub>O and 11.1 µM 4,4-dimethyl-4-silapentane-1-  
926 sulfonic acid (DSS, internal standard). The final protein concentration of truncated (aa 30-297),  
927 <sup>2</sup>H, <sup>12</sup>C, <sup>15</sup>N and <sup>1</sup>H, <sup>13</sup>C-methyl-ILVT labeled BKV VP1 was 125 µM (monomer concentration) in all  
928 experiments. The 13-mer D1<sub>min</sub> (Ac-APQWMLPLLLGLY-NH<sub>2</sub>) and alanine substitution peptide  
929 D1<sub>min</sub> W293A (Ac-APQAMLPLLLGLY-NH<sub>2</sub>) were dissolved in d<sub>6</sub>-DMSO and added to the protein  
930 at various concentrations (6.25 µM – 200 µM).

931 1D-<sup>1</sup>H NMR experiments were acquired with 64 scans, excitation sculpting water suppression and  
932 a relaxation delay of 2 seconds. 2D <sup>1</sup>H, <sup>13</sup>C-HMQC SOFAST (Schanda et al., 2005) spectra were  
933 recorded using 50% non-uniform sampling, 1024 and 256 points in the direct and indirect  
934 dimensions, respectively, 192 scans and a recycling delay of 200 milliseconds. Spectra were  
935 processed and analyzed using TOPSPIN version 3.5. Methyl peak assignments were obtained  
936 by means of twelve amino acid point mutations (L68A, L254M, V136I, V231I, V234I, T46S,  
937 T118S, T224S, T238S, T240S, T277S, I45V; see **Supplement Figure S3B** for an example of this  
938 method) and by using a methyl walk approach based on <sup>13</sup>C-resolved 4D-HMQC-NOESY-HMCQ  
939 experiments (Proudfoot et al., 2016).

940

941 ACKNOWLEDGEMENTS

942 We thank Weidong Zhong, Kelly Wong, Dirksen Bussiere, and Don Ganem for their leadership  
943 roles, Catherine Jones for important intellectual contributions in project team management, Atul  
944 Sathe, Lihong Zhao, and Sue Ma for their guidance, advice, and assistance with polyomavirus  
945 virology, and members of the local postdoctoral community for their support. All authors were  
946 funded by Novartis Institutes for Biomedical Research. J.R.K is a postdoctoral fellow at Novartis  
947 Institutes for Biomedical Research. S.F., J.S., A.F., A.O.F., M.K., P.K., E.O., C.C., J.R.A, and  
948 C.A.W. are or were employees of Novartis Institutes for Biomedical Research at the time of these  
949 studies.

950

951 AUTHOR CONTRIBUTIONS

952 J.R.K, J.R.A., and C.A.W. wrote the manuscript. J.R.K performed peptide antiviral assays, peptide  
953 cytotoxicity assays, *in vitro* peptide affinity purifications, fractionation assays, VP2/3 exposure  
954 studies, and associated data analysis. S.F. and C.A.W. performed biophysical and biochemical  
955 assays. J.S. performed purification of protein reagents and VLPs. M.K., D.B., E.O., and C.C.  
956 performed XRC studies. A.F. and A.O.F. performed NMR experiments. J.R.K. and J.R.A.  
957 performed time of addition study. J.R.K. and P.K. performed mutant virus spread assays.

958

959 COMPETING INTERESTS

960 Novartis Corporation has filed a patent on the peptides referenced in this work.

961

962

963

964

965 REFERENCES

966

967 Abend, J., Dragic, Z., Feire, A.L., Knapp, M., Kovacs, S., Traggiai, E., Wang, L., Wang, Y., Wu, D., Wu, Q., *et*  
968 *al.* (2017). POLYOMAVIRUS NEUTRALIZING ANTIBODIES (Novartis AG (Basel, CH)).

969 Abend, J.R., Low, J.A., and Imperiale, M.J. (2007). Inhibitory effect of gamma interferon on BK virus gene  
970 expression and replication. *J Virol* 81, 272-279.

971 Ahsan, N., and Shah, K.V. (2006). Polyomaviruses and human diseases. *Adv Exp Med Biol* 577, 1-18.

972 Ambalathingal, G.R., Francis, R.S., Smyth, M.J., Smith, C., and Khanna, R. (2017). BK Polyomavirus: Clinical  
973 Aspects, Immune Regulation, and Emerging Therapies. *Clin Microbiol Rev* 30, 503-528.

974 Bagchi, P., Inoue, T., and Tsai, B. (2016). EMC1-dependent stabilization drives membrane penetration of  
975 a partially destabilized non-enveloped virus. *Elife* 5.

976 Bagchi, P., Walczak, C.P., and Tsai, B. (2015). The endoplasmic reticulum membrane J protein C18 executes  
977 a distinct role in promoting simian virus 40 membrane penetration. *J Virol* 89, 4058-4068.

978 Barouch, D.H., and Harrison, S.C. (1994). Interactions among the Major and Minor Coat Proteins of  
979 Polyomavirus. *Journal of Virology* 68, 3982-3989.

980 Bennett, S.M., Jiang, M., and Imperiale, M.J. (2013). Role of cell-type-specific endoplasmic reticulum-  
981 associated degradation in polyomavirus trafficking. *J Virol* 87, 8843-8852.

982 Bennett, S.M., Zhao, L., Bosard, C., and Imperiale, M.J. (2015). Role of a nuclear localization signal on the  
983 minor capsid proteins VP2 and VP3 in BKPyV nuclear entry. *Virology* 474, 110-116.

984 Blair, W.S., Pickford, C., Irving, S.L., Brown, D.G., Anderson, M., Bazin, R., Cao, J., Ciaramella, G., Isaacson,  
985 J., Jackson, L., *et al.* (2010). HIV capsid is a tractable target for small molecule therapeutic intervention.  
986 *PLoS Pathog* 6, e1001220.

987 Bohl, D.L., and Brennan, D.C. (2007). BK virus nephropathy and kidney transplantation. *Clin J Am Soc*  
988 *Nephrol* 2 *Suppl* 1, S36-46.



989 Buck, C.B., Van Doorslaer, K., Peretti, A., Geoghegan, E.M., Tisza, M.J., An, P., Katz, J.P., Pipas, J.M.,  
990 McBride, A.A., Camus, A.C., *et al.* (2016). The Ancient Evolutionary History of Polyomaviruses. *PLoS Pathog*  
991 *12*, e1005574.

992 Byrd, C.M., Dai, D., Grosenbach, D.W., Berhanu, A., Jones, K.F., Cardwell, K.B., Schneider, C., Wineinger,  
993 K.A., Page, J.M., Harver, C., *et al.* (2013). A novel inhibitor of dengue virus replication that targets the  
994 capsid protein. *Antimicrob Agents Chemother* *57*, 15-25.

995 Carbone, M., Ascione, G., Chichiarelli, S., Garcia, M.I., Eufemi, M., and Amati, P. (2003). Chromosome-  
996 Protein Interactions in Polyomavirus Virions. *Journal of Virology* *78*, 513-519.

997 Chen, X.S., Stehle, T., and Harrison, S.C. (1998). Interaction of polyomavirus internal protein VP2 with the  
998 major capsid protein VP1 and implications for participation of VP2 in viral entry. *EMBO J* *17*, 3233-3240.

999 Clever, J., Dean, D.A., and Kasamatsu, H. (1993). Identification of a DNA binding domain in simian virus 40  
1000 capsid proteins Vp2 and Vp3. *J Biol Chem* *268*, 20877-20883.

1001 Cubitt, C.L. (2006). Molecular genetics of the BK virus. *Adv Exp Med Biol* *577*, 85-95.

1002 Cunningham, B.C., and Wells, J.A. (1989). High-resolution epitope mapping of hGH-receptor interactions  
1003 by alanine-scanning mutagenesis. *Science* *244*, 1081-1085.

1004 Daugherty, M.D., and Malik, H.S. (2012). Rules of engagement: molecular insights from host-virus arms  
1005 races. *Annu Rev Genet* *46*, 677-700.

1006 De Colibus, L., Wang, X., Spyrou, J.A.B., Kelly, J., Ren, J., Grimes, J., Puerstinger, G., Stonehouse, N., Walter,  
1007 T.S., Hu, Z., *et al.* (2014). More-powerful virus inhibitors from structure-based analysis of HEV71 capsid-  
1008 binding molecules. *Nat Struct Mol Biol* *21*, 282-288.

1009 Deres, K., Schroder, C.H., Paessens, A., Goldmann, S., Hacker, H.J., Weber, O., Kramer, T., Niewohner, U.,  
1010 Pleiss, U., Stoltefuss, J., *et al.* (2003). Inhibition of hepatitis B virus replication by drug-induced depletion  
1011 of nucleocapsids. *Science* *299*, 893-896.

- 1012 Duffy, S., Shackelton, L.A., and Holmes, E.C. (2008). Rates of evolutionary change in viruses: patterns and  
1013 determinants. *Nat Rev Genet* 9, 267-276.
- 1014 Dupzyk, A., and Tsai, B. (2016). How Polyomaviruses Exploit the ERAD Machinery to Cause Infection.  
1015 *Viruses* 8.
- 1016 Dupzyk, A., Williams, J.M., Bagchi, P., Inoue, T., and Tsai, B. (2017). SGTA-Dependent Regulation of Hsc70  
1017 Promotes Cytosol Entry of Simian Virus 40 from the Endoplasmic Reticulum. *J Virol* 91.
- 1018 Eash, S., and Atwood, W.J. (2005). Involvement of cytoskeletal components in BK virus infectious entry. *J*  
1019 *Virol* 79, 11734-11741.
- 1020 Eash, S., Querbes, W., and Atwood, W.J. (2004). Infection of vero cells by BK virus is dependent on  
1021 caveolae. *J Virol* 78, 11583-11590.
- 1022 Fang, C.Y., Chen, H.Y., Wang, M., Chen, P.L., Chang, C.F., Chen, L.S., Shen, C.H., Ou, W.C., Tsai, M.D., Hsu,  
1023 P.H., *et al.* (2010). Global analysis of modifications of the human BK virus structural proteins by LC-MS/MS.  
1024 *Virology* 402, 164-176.
- 1025 Feng, H., Shuda, M., Chang, Y., and Moore, P.S. (2008). Clonal integration of a polyomavirus in human  
1026 Merkel cell carcinoma. *Science* 319, 1096-1100.
- 1027 Fox, M.P., Otto, M.J., and McKinlay, M.A. (1986). Prevention of rhinovirus and poliovirus uncoating by  
1028 WIN 51711, a new antiviral drug. *Antimicrob Agents Chemother* 30, 110-116.
- 1029 Gardner, S.D., Field, A.M., Coleman, D.V., and Hulme, B. (1971). New human papovavirus (B.K.) isolated  
1030 from urine after renal transplantation. *Lancet* 1, 1253-1257.
- 1031 Geiger, R., Andrichke, D., Friebe, S., Herzog, F., Luisoni, S., Heger, T., and Helenius, A. (2011). BAP31 and  
1032 BiP are essential for dislocation of SV40 from the endoplasmic reticulum to the cytosol. *Nat Cell Biol* 13,  
1033 1305-1314.
- 1034 Gellman, S.H. (1998). Minimal model systems for beta sheet secondary structure in proteins. *Curr Opin*  
1035 *Chem Biol* 2, 717-725.

1036 Goodwin, E.C., Lipovsky, A., Inoue, T., Magaldi, T.G., Edwards, A.P., Van Goor, K.E., Paton, A.W., Paton,  
1037 J.C., Atwood, W.J., Tsai, B., *et al.* (2011). BiP and multiple DNAJ molecular chaperones in the endoplasmic  
1038 reticulum are required for efficient simian virus 40 infection. *MBio* 2, e00101-00111.

1039 Griffith, J.P., Griffith, D.L., Rayment, I., Murakami, W.T., and Caspar, D.L. (1992). Inside polyomavirus at  
1040 25-A resolution. *Nature* 355, 652-654.

1041 Hara, K., Sugimoto, C., Kitamura, T., Aoki, N., Taguchi, F., and Yogo, Y. (1998). Archetype JC virus efficiently  
1042 replicates in COS-7 cells, simian cells constitutively expressing simian virus 40 T antigen. *J Virol* 72, 5335-  
1043 5342.

1044 Helle, F., Brochot, E., Handala, L., Martin, E., Castelain, S., Francois, C., and Duverlie, G. (2017). Biology of  
1045 the BKPyV: An Update. *Viruses* 9.

1046 Heritage, J., Chesters, P.M., and McCance, D.J. (1981). The persistence of papovavirus BK DNA sequences  
1047 in normal human renal tissue. *J Med Virol* 8, 143-150.

1048 Horton, K.L., Stewart, K.M., Fonseca, S.B., Guo, Q., and Kelley, S.O. (2008). Mitochondria-penetrating  
1049 peptides. *Chem Biol* 15, 375-382.

1050 Hurdiss, D.L., Frank, M., Snowden, J.S., Macdonald, A., and Ranson, N.A. (2018). The Structure of an  
1051 Infectious Human Polyomavirus and Its Interactions with Cellular Receptors. *Structure*.

1052 Hurdiss, D.L., Morgan, E.L., Thompson, R.F., Prescott, E.L., Panou, M.M., Macdonald, A., and Ranson, N.A.  
1053 (2016). New Structural Insights into the Genome and Minor Capsid Proteins of BK Polyomavirus using  
1054 Cryo-Electron Microscopy. *Structure* 24, 528-536.

1055 Inoue, T., and Tsai, B. (2011). A large and intact viral particle penetrates the endoplasmic reticulum  
1056 membrane to reach the cytosol. *PLoS Pathog* 7, e1002037.

1057 Inoue, T., and Tsai, B. (2017). Regulated Erlin-dependent release of the B12 transmembrane J-protein  
1058 promotes ER membrane penetration of a non-enveloped virus. *PLoS Pathog* 13, e1006439.

- 1059 Jiang, M., Abend, J.R., Tsai, B., and Imperiale, M.J. (2009). Early events during BK virus entry and  
1060 disassembly. *J Virol* *83*, 1350-1358.
- 1061 Kamentsky, L., Jones, T.R., Fraser, A., Bray, M.A., Logan, D.J., Madden, K.L., Ljosa, V., Rueden, C., Eliceiri,  
1062 K.W., and Carpenter, A.E. (2011). Improved structure, function and compatibility for CellProfiler: modular  
1063 high-throughput image analysis software. *Bioinformatics* *27*, 1179-1180.
- 1064 Kean, J.M., Rao, S., Wang, M., and Garcea, R.L. (2009). Seroepidemiology of human polyomaviruses. *PLoS*  
1065 *Pathog* *5*, e1000363.
- 1066 Kistler, A.L., Webster, D.R., Rouskin, S., Magrini, V., Credle, J.J., Schnurr, D.P., Boushey, H.A., Mardis, E.R.,  
1067 Li, H., and DeRisi, J.L. (2007). Genome-wide diversity and selective pressure in the human rhinovirus. *Virology*  
1068 *J* *4*, 40.
- 1069 Klumpp, K., Shimada, T., Allweiss, L., Volz, T., Lutgehetmann, M., Hartman, G., Flores, O.A., Lam, A.M., and  
1070 Dandri, M. (2018). Efficacy of NVR 3-778, Alone and In Combination With Pegylated Interferon, vs  
1071 Entecavir In uPA/SCID Mice With Humanized Livers and HBV Infection. *Gastroenterology* *154*, 652-662  
1072 e658.
- 1073 Knowles, W.A. (2001). The Epidemiology of BK Virus and the Occurrence of Antigenic and Genomic  
1074 Subtypes. 527-559.
- 1075 Knowles, W.A. (2006). Discovery and epidemiology of the human polyomaviruses BK virus (BKV) and JC  
1076 virus (JCV). *Adv Exp Med Biol* *577*, 19-45.
- 1077 Kumar, C.S., Dey, D., Ghosh, S., and Banerjee, M. (2018). Breach: Host Membrane Penetration and Entry  
1078 by Nonenveloped Viruses. *Trends Microbiol* *26*, 525-537.
- 1079 Kuypers, D.R. (2012). Management of polyomavirus-associated nephropathy in renal transplant  
1080 recipients. *Nat Rev Nephrol* *8*, 390-402.

1081 Lamorte, L., Titolo, S., Lemke, C.T., Goudreau, N., Mercier, J.F., Wardrop, E., Shah, V.B., von Schwedler,  
1082 U.K., Langelier, C., Banik, S.S., *et al.* (2013). Discovery of novel small-molecule HIV-1 replication inhibitors  
1083 that stabilize capsid complexes. *Antimicrob Agents Chemother* *57*, 4622-4631.

1084 Liddington, R.C., Yan, Y., Moulai, J., Sahli, R., Benjamin, T.L., and Harrison, S.C. (1991). Structure of simian  
1085 virus 40 at 3.8-Å resolution. *Nature* *354*, 278-284.

1086 Low, J.A., Magnuson, B., Tsai, B., and Imperiale, M.J. (2006). Identification of gangliosides GD1b and GT1b  
1087 as receptors for BK virus. *J Virol* *80*, 1361-1366.

1088 Lozano, T., Gorraiz, M., Lasarte-Cia, A., Ruiz, M., Rabal, O., Oyarzabal, J., Hervas-Stubbs, S., Llopiz, D.,  
1089 Sarobe, P., Prieto, J., *et al.* (2017). Blockage of FOXP3 transcription factor dimerization and FOXP3/AML1  
1090 interaction inhibits T regulatory cell activity: sequence optimization of a peptide inhibitor. *Oncotarget* *8*,  
1091 71709-71724.

1092 Lunde, L.E., Dasaraju, S., Cao, Q., Cohn, C.S., Reding, M., Bejanyan, N., Trottier, B., Rogosheske, J.,  
1093 Brunstein, C., Warlick, E., *et al.* (2015). Hemorrhagic cystitis after allogeneic hematopoietic cell  
1094 transplantation: risk factors, graft source and survival. *Bone Marrow Transplant* *50*, 1432-1437.

1095 Madeira, F., Park, Y.M., Lee, J., Buso, N., Gur, T., Madhusoodanan, N., Basutkar, P., Tivey, A.R.N., Potter,  
1096 S.C., Finn, R.D., *et al.* (2019). The EMBL-EBI search and sequence analysis tools APIs in 2019. *Nucleic Acids*  
1097 *Res* *47*, W636-W641.

1098 Magnuson, B., Rainey, E.K., Benjamin, T., Baryshev, M., Mkrtchian, S., and Tsai, B. (2005). ERp29 triggers  
1099 a conformational change in polyomavirus to stimulate membrane binding. *Mol Cell* *20*, 289-300.

1100 Manning, M.C., Illangasekare, M., and Woody, R.W. (1988). Circular dichroism studies of distorted alpha-  
1101 helices, twisted beta-sheets, and beta turns. *Biophys Chem* *31*, 77-86.

1102 McCoy, A.J., Grosse-Kunstleve, R.W., Adams, P.D., Winn, M.D., Storoni, L.C., and Read, R.J. (2007). Phaser  
1103 crystallographic software. *J Appl Crystallogr* *40*, 658-674.

- 1104 Moriyama, T., and Sorokin, A. (2008). Intracellular trafficking pathway of BK Virus in human renal proximal  
1105 tubular epithelial cells. *Virology* 371, 336-349.
- 1106 Nakanishi, A., Clever, J., Yamada, M., Li, P.P., and Kasamatsu, H. (1996). Association with capsid proteins  
1107 promotes nuclear targeting of simian virus 40 DNA. *Proc Natl Acad Sci U S A* 93, 96-100.
- 1108 Nakanishi, A., Nakamura, A., Liddington, R., and Kasamatsu, H. (2006). Identification of amino acid  
1109 residues within simian virus 40 capsid proteins Vp1, Vp2, and Vp3 that are required for their interaction  
1110 and for viral infection. *J Virol* 80, 8891-8898.
- 1111 Nakanishi, A., Shum, D., Morioka, H., Otsuka, E., and Kasamatsu, H. (2002). Interaction of the Vp3 Nuclear  
1112 Localization Signal with the Importin  $\alpha$  Heterodimer Directs Nuclear Entry of Infecting Simian Virus 40.  
1113 *Journal of Virology* 76, 9368-9377.
- 1114 Nelson, C.D., Stroh, L.J., Gee, G.V., O'Hara, B.A., Stehle, T., and Atwood, W.J. (2015). Modulation of a pore  
1115 in the capsid of JC polyomavirus reduces infectivity and prevents exposure of the minor capsid proteins. *J*  
1116 *Virol* 89, 3910-3921.
- 1117 Neu, U., Allen, S.A., Blaum, B.S., Liu, Y., Frank, M., Palma, A.S., Stroh, L.J., Feizi, T., Peters, T., Atwood, W.J.,  
1118 *et al.* (2013). A structure-guided mutation in the major capsid protein retargets BK polyomavirus. *PLoS*  
1119 *Pathog* 9, e1003688.
- 1120 Nilsson, J., Miyazaki, N., Xing, L., Wu, B., Hammar, L., Li, T.C., Takeda, N., Miyamura, T., and Cheng, R.H.  
1121 (2005). Structure and assembly of a T=1 virus-like particle in BK polyomavirus. *J Virol* 79, 5337-5345.
- 1122 Norkin, L.C., Anderson, H.A., Wolfrom, S.A., and Oppenheim, A. (2002). Caveolar Endocytosis of Simian  
1123 Virus 40 Is Followed by Brefeldin A-Sensitive Transport to the Endoplasmic Reticulum, Where the Virus  
1124 Disassembles. *Journal of Virology* 76, 5156-5166.
- 1125 Padgett, B.L., Walker, D.L., ZuRhein, G.M., Eckroade, R.J., and Dessel, B.H. (1971). Cultivation of papova-  
1126 like virus from human brain with progressive multifocal leucoencephalopathy. *Lancet* 1, 1257-1260.

- 1127 Pastrana, D.V., Ray, U., Magaldi, T.G., Schowalter, R.M., Cuburu, N., and Buck, C.B. (2013). BK  
1128 polyomavirus genotypes represent distinct serotypes with distinct entry tropism. *J Virol* *87*, 10105-10113.
- 1129 Proudfoot, A., Frank, A.O., Ruggiu, F., Mamo, M., and Lingel, A. (2016). Facilitating unambiguous NMR  
1130 assignments and enabling higher probe density through selective labeling of all methyl containing amino  
1131 acids. *J Biomol NMR* *65*, 15-27.
- 1132 R Core Team (2018). R: A Language and Environment for Statistical Computing (Vienna, Austria: R  
1133 Foundation for Statistical Computing).
- 1134 Ravindran, M.S., Engelke, M.F., Verhey, K.J., and Tsai, B. (2017). Exploiting the kinesin-1 molecular motor  
1135 to generate a virus membrane penetration site. *Nat Commun* *8*, 15496.
- 1136 Schanda, P., Kupce, E., and Brutscher, B. (2005). SOFAST-HMQC experiments for recording two-  
1137 dimensional heteronuclear correlation spectra of proteins within a few seconds. *J Biomol NMR* *33*, 199-  
1138 211.
- 1139 Schelhaas, M., Malmstrom, J., Pelkmans, L., Haugstetter, J., Ellgaard, L., Grunewald, K., and Helenius, A.  
1140 (2007). Simian Virus 40 depends on ER protein folding and quality control factors for entry into host cells.  
1141 *Cell* *131*, 516-529.
- 1142 Schindelin, J., Arganda-Carreras, I., Frise, E., Kaynig, V., Longair, M., Pietzsch, T., Preibisch, S., Rueden, C.,  
1143 Saalfeld, S., Schmid, B., *et al.* (2012). Fiji: an open-source platform for biological-image analysis. *Nat*  
1144 *Methods* *9*, 676-682.
- 1145 Shinohara, T., Matsuda, M., Cheng, S.H., Marshall, J., Fujita, M., and Nagashima, K. (1993). BK virus  
1146 infection of the human urinary tract. *J Med Virol* *41*, 301-305.
- 1147 Sood, P., Senanayake, S., Sujeet, K., Medipalli, R., Zhu, Y.R., Johnson, C.P., and Hariharan, S. (2012).  
1148 Management and outcome of BK viremia in renal transplant recipients: a prospective single-center study.  
1149 *Transplantation* *94*, 814-821.

1150 Soussi, T. (1986). DNA-binding properties of the major structural protein of simian virus 40. *J Virol* 59, 740-  
1151 742.

1152 Tokuriki, N., Oldfield, C.J., Uversky, V.N., Berezovsky, I.N., and Tawfik, D.S. (2009). Do viral proteins possess  
1153 unique biophysical features? *Trends Biochem Sci* 34, 53-59.

1154 Van Roey, K., Uyar, B., Weatheritt, R.J., Dinkel, H., Seiler, M., Budd, A., Gibson, T.J., and Davey, N.E. (2014).  
1155 Short linear motifs: ubiquitous and functionally diverse protein interaction modules directing cell  
1156 regulation. *Chem Rev* 114, 6733-6778.

1157 Vives, E., Brodin, P., and Lebleu, B. (1997). A truncated HIV-1 Tat protein basic domain rapidly translocates  
1158 through the plasma membrane and accumulates in the cell nucleus. *J Biol Chem* 272, 16010-16017.

1159 Vonrhein, C., Flensburg, C., Keller, P., Sharff, A., Smart, O., Paciorek, W., Womack, T., and Bricogne, G.  
1160 (2011). Data processing and analysis with the autoPROC toolbox. *Acta Crystallogr D Biol Crystallogr* 67,  
1161 293-302.

1162 Winn, M.D., Ballard, C.C., Cowtan, K.D., Dodson, E.J., Emsley, P., Evans, P.R., Keegan, R.M., Krissinel, E.B.,  
1163 Leslie, A.G., McCoy, A., *et al.* (2011). Overview of the CCP4 suite and current developments. *Acta*  
1164 *Crystallogr D Biol Crystallogr* 67, 235-242.

1165 Yang, Y., Ma, J., Song, Z., and Wu, M. (2002). HIV-1 TAT-mediated protein transduction and subcellular  
1166 localization using novel expression vectors. *FEBS Lett* 532, 36-44.

1167 Zhao, L.B., and Imperiale, M.J. (2017). Identification of Rab18 as an Essential Host Factor for BK  
1168 Polyomavirus Infection Using a Whole-Genome RNA Interference Screen. *Msphere* 2.

1169 Zins, S.R., Nelson, C.D., Maginnis, M.S., Banerjee, R., O'Hara, B.A., and Atwood, W.J. (2014). The human  
1170 alpha defensin HD5 neutralizes JC polyomavirus infection by reducing endoplasmic reticulum traffic and  
1171 stabilizing the viral capsid. *J Virol* 88, 948-960.

1172

1173



1174 TABLES

1175

1176 **Table 1.** Peptide IC<sub>50</sub> and K<sub>D</sub> measurements. Values are mean ± SD where applicable

1177 (AlphaScreen: n=3; SPR: n=2). ND: Not determined.

| Peptide Name            | Sequence                           | AlphaScreen VP1 IC <sub>50</sub> (nM) | SPR VP1 K <sub>D</sub> (nM) | Relative IC <sub>50</sub> (vs D1 <sub>min</sub> ) | Relative K <sub>D</sub> (vs D1 <sub>min</sub> ) |
|-------------------------|------------------------------------|---------------------------------------|-----------------------------|---------------------------------------------------|-------------------------------------------------|
| D1 <sub>22</sub>        | APGGANQRTAPQWMLPLLLGLY             | 11±2.9                                | 4.8                         | 2.8                                               | 3.6                                             |
| D1 <sub>min</sub>       | Ac- APQWMLPLLLGLY- NH <sub>2</sub> | 3.6±0.57                              | 1.4±0.49                    | 1.0                                               | 1.0                                             |
| D1 <sub>min</sub> P291A | Ac- AAQWMLPLLLGLY- NH <sub>2</sub> | 3.6±0.16                              | 3.6                         | 1.0                                               | 2.9                                             |
| D1 <sub>min</sub> Q292A | Ac- APAWMLPLLLGLY- NH <sub>2</sub> | 15±1.2                                | 18                          | 3.8                                               | 13                                              |
| D1 <sub>min</sub> W293A | Ac- APQAMLPLLLGLY- NH <sub>2</sub> | 3600±380                              | 920±190                     | 900                                               | 660                                             |
| D1 <sub>min</sub> M294A | Ac- APQWALPLLLGLY- NH <sub>2</sub> | 220±18                                | 100                         | 55                                                | 71                                              |
| D1 <sub>min</sub> L295A | Ac- APQWMLPLLLGLY- NH <sub>2</sub> | 130±34                                | 110±15                      | 32                                                | 75                                              |
| D1 <sub>min</sub> P296A | Ac- APQWMLALLLGLY- NH <sub>2</sub> | 27±7.9                                | 51±39                       | 6.8                                               | 36                                              |
| D1 <sub>min</sub> L297A | Ac- APQWMLPALLGLY- NH <sub>2</sub> | 5200±1100                             | 1600±610                    | 1300                                              | 1200                                            |
| D1 <sub>min</sub> L298A | Ac- APQWMLPLALGLY- NH <sub>2</sub> | 2000±310                              | 1000±160                    | 500                                               | 720                                             |
| D1 <sub>min</sub> L299A | Ac- APQWMLPLLGLY- NH <sub>2</sub>  | 140±24                                | 97±11                       | 35                                                | 69                                              |
| D1 <sub>min</sub> G300A | Ac- APQWMLPLLLALY- NH <sub>2</sub> | 8.5±0.83                              | 9.3                         | 2.0                                               | 6.4                                             |
| D1 <sub>min</sub> L301A | Ac- APQWMLPLLLGAY- NH <sub>2</sub> | 14±1.6                                | 11                          | 3.5                                               | 7.9                                             |
| D1 <sub>min</sub> Y302A | Ac- APQWMLPLLLGLA- NH <sub>2</sub> | 62±6.5                                | 70±3.8                      | 16                                                | 50                                              |
| D1 <sub>min</sub> HEX1  | Ac- APQWML- NH <sub>2</sub>        | 140±44                                | ND                          | 35                                                | ND                                              |
| D1 <sub>min</sub> HEX2  | Ac- PQWMLP- NH <sub>2</sub>        | 1100±270                              | ND                          | 280                                               | ND                                              |
| D1 <sub>min</sub> HEX3  | Ac- QWMLPL- NH <sub>2</sub>        | 1800±400                              | ND                          | 450                                               | ND                                              |
| D1 <sub>min</sub> HEX4  | Ac- WMLPLL- NH <sub>2</sub>        | 15000±4500                            | ND                          | 3800                                              | ND                                              |
| D1 <sub>min</sub> HEX5  | Ac- MLPLL- NH <sub>2</sub>         | 17000±3500                            | ND                          | 4200                                              | ND                                              |
| D1 <sub>min</sub> HEX6  | Ac- LPLLLG- NH <sub>2</sub>        | 38000,<br>>40000,<br>>40000           | ND                          | 9600                                              | ND                                              |
| D1 <sub>min</sub> HEX7  | Ac- PLLLGL- NH <sub>2</sub>        | 19000±2500                            | ND                          | 4700                                              | ND                                              |
| D1 <sub>min</sub> HEX8  | Ac- LLLGLY- NH <sub>2</sub>        | 490±120                               | ND                          | 120                                               | ND                                              |

1178

1179

1180

1181

1182

1183

1184

1185

1186

1187

1188 FIGURES

1189

1190 **Figure 1.** Identification of D1<sub>min</sub> peptide and key residues contributing to interaction with VP1.

1191 **A.** Multiple sequence alignment of VP2/3 D1 region and flanking sequence. BKV: BK  
1192 polyomavirus; JCV: JC polyomavirus. **B.** Sequence and index within BKV VP2 of peptides used  
1193 in this study, highlighting alanine-scanning mutagenesis. Ac: acetyl group **C.** Representative  
1194 surface plasmon resonance (SPR) sensorgram of single-cycle kinetic experiment showing  
1195 association of D1<sub>min</sub> with VP1 pentamer. Multiple (five) injections are shown, and dissociation of  
1196 the peptide starts at peak response. Experimental data (red) and the 1:1 model of responses  
1197 (black) are shown. **D.** Results of AlphaScreen competitive binding assay. Displacement of  
1198 carboxy-terminal biotinylated D1<sub>22</sub> peptide from either BKV or JCV VP1 was assayed using D1<sub>22</sub>  
1199 (BKV and JCV) or D1<sub>min</sub> (BKV only), with IC<sub>50</sub> concentration determined (mean ± SD, n=3 for BKV  
1200 VP1, n=2 for JCV VP1). **E.** SPR-measured VP1 binding affinity ( $K_D$ ) and AlphaScreen  
1201 displacement assay results (IC<sub>50</sub>; mean ± SD, n=3) for single-site alanine substitutions in D1<sub>min</sub>.  
1202 **F.** AlphaScreen displacement assay IC<sub>50</sub> values for D1<sub>min</sub> rolling hexamer peptides (mean of n=3).  
1203 Color indicates the number of key residues (W293, L297, or L298) present in the hexamer.

1204

1205 **Figure 2.** NMR characterization of the VP1-D1<sub>min</sub> interaction.

1206 **A.** <sup>1</sup>H,<sup>13</sup>C-HMQC spectra showing peptide (12.5 μM) induced perturbations of tr-VP1 (125 μM;  
1207 black) ILVT methyl signals. **Left:** the wild-type D1<sub>min</sub> peptide (magenta) causes CSPs and line  
1208 broadening of peaks clustered in the upper pore of the target protein. The disappearance of peaks  
1209 indicates slow exchange kinetics and thus, strong (usually sub-micromolar) binding (see inset in  
1210 upper right corner). At sub-stoichiometric peptide concentrations no binding to a second site is  
1211 observed as there are no changes of I45 (see inset in upper corner). **Right:** alanine-substituted  
1212 W293A peptide (red) induces the same CSP pattern as the wild-type peptide, however, exchange  
1213 kinetics are fast and no line broadening is observed. There is also no second site binding

1214 observed at low peptide concentrations. **B.** VP1 residues highlighted in **A** overlaid on X-ray  
1215 structure of VP1 pentamer, looking down into the pore (left) and a cutaway side-view of three VP1  
1216 monomers (right). Spheres highlight VP1 residues that exhibit CSPs upon peptide binding (T224,  
1217 T226, V231, and V234). Residue T243 is lower in the pore (shown in gray) and does not exhibit  
1218 perturbations upon peptide binding (PDB: 4MJ1; Neu et al., 2013). **C.** Relative binding affinities  
1219 of D1<sub>22</sub> peptide to wild-type VP1 protein or VP1 containing pore residue substitutions using  
1220 AlphaScreen detection method. Values are normalized to wild-type VP1 (mean ± SD). **D.** Overlay  
1221 of “second-site” VP1 residues (I45, T46, T118, T238, T243; blue) on cryo-EM model of BKV VP1  
1222 (grey) and VP2 (orange) (adapted from PDB 6ESB, Hurdiss et al., 2018).

1223

1224 **Figure 3.** X-ray structurally-guided model of D1<sub>min</sub>-VP1 pentamer complex shows key residues  
1225 mediating interaction.

1226 **A.** Structurally-guided model of structure of D1<sub>min</sub> peptide bound to BKV VP1 pentamer. (Left)  
1227 Top-down view of the model. (Right) Cutaway representation showing three VP1 molecules of  
1228 the pentamer with D1<sub>min</sub> peptide bound. **B.** D1<sub>min</sub> 2Fo-Fc electron density map, contoured at 1σ,  
1229 with model of peptide residues <sub>292</sub>QWLPLLLGLY<sub>302</sub> built with guidance from the experimental  
1230 maps. Start, end residues, as well as key binding residues W293, L297, and L298 are highlighted.  
1231 **C.** Close-up of hydrophobic pocket formed by VP1 pore residues T226, V231, P232, and V234.  
1232 Blue, orange, and green residues represent three distinct VP1 molecules within the pentamer.  
1233 D1<sub>min</sub> electron density for residues L297 and L298 (yellow), shown contoured to 1σ, correspond  
1234 to regions of closest approach of the peptide to the pocket.

1235

1236 **Figure 4.** D1<sub>min</sub> peptide has nanomolar antiviral activity.

1237 **A.** Dose-response curves for wild-type D1<sub>min</sub> peptide and three alanine-substituted variants  
1238 (W293A, L297A, L298A) in single-round BKV infection assay in RPTE cells (mean ± SD, n=3),  
1239 and table of derived EC<sub>50</sub> values. Productive infection is quantified by fraction of RPTE cells

1240 expressing BKV TAg by indirect immunofluorescent staining 48 hours post-infection (h.p.i). **B.**  
1241 CellTiter-Glo luminescent cell viability assay to measure  $D1_{min}$  cytotoxicity in RPTE cells after two  
1242 days of treatment. Relative light units (RLUs) are normalized to DMSO treatment (mean  $\pm$  SD,  
1243  $n=2$ ). **C.**  $D1_{min}$   $EC_{50}$  values with 95% confidence intervals (CI) are shown for single-round infection  
1244 assay of JCV and BKV in COS-7 cells, measuring fraction of VP1 expressing cells 72 h.p.i. **D.**  
1245 Coomassie-stained gel showing streptavidin purification of VP1 pentamers, VP1 VLPs, or  
1246 infectious BKV virions using either  $D1_{22}$  or biotinylated- $D1_{22}$  peptide. **E.** BKV spreading infection  
1247 assay with VP1 pore mutants, measuring TAg-positive cells 3, 6, and 9 days post-transfection of  
1248 BKV genomic DNA. d.p.t.: days post-transfection (mean  $\pm$  SD,  $n=2$ ). **F.** Same as **E**, with BKV  
1249 VP2/3 mutants (mean  $\pm$  SD,  $n=3$ ). While residue position is relative to VP2, VP2/3 indicates  
1250 mutation is present in both proteins.

1251

1252 **Figure 5.**  $D1_{min}$  inhibits key steps in virion processing during entry

1253 **A.** Schematic of time-of-addition assay. **B.** Time of addition assay with  $D1_{min}$ , cell-penetrating  
1254 peptides TAT- $D1_{min}$  and  $D1_{min}$ -TAT, and anti-BKV neutralizing antibody P8D11. BKV infected cells  
1255 were treated with inhibitors at 10-fold over measured  $EC_{50}$  concentrations. Productive infection is  
1256 measured by the fraction of RPTE cells expressing BKV TAg by indirect immunofluorescent  
1257 staining 48 hours post-infection (h.p.i), relative to DMSO-treated samples (mean  $\pm$  SD,  $n=4$ ). **C.**  
1258 Virus cell binding inhibitor assay. BKV was treated with indicated inhibitor at indicated  
1259 concentrations for 1 hour on ice, adsorbed to cells for 1 hour at 4°C, unbound virus washed away,  
1260 and remaining cell-associated virus measured by indirect immunofluorescent staining of VP1  
1261 (mean  $\pm$  SD,  $n=3$ ). **D.** ER-to-cytosol retrotranslocation assay. RPTE cells subjected to a  
1262 synchronized BKV infection (high MOI), cells were harvested 24 h.p.i, and lysates were  
1263 fractionated into a supernatant (cytoplasmic) and pellet fraction. Fractions were then analyzed by  
1264 SDS-PAGE, and VP1 protein and cellular compartment markers were detected by  
1265 immunoblotting. **E.** Representative microscopy images of VP2/3 exposure assay. Minor capsid

1266 proteins were detected using a polyclonal antibody able to recognize both VP2 and VP3. Scale  
1267 bar: 20  $\mu$ m. **F.** Quantification of images exemplified in **E**, measuring fraction of VP1 stain co-  
1268 localizing with VP2/3 stain, averaged per well. Rotated data indicates calculated co-localization  
1269 between VP1 and VP2/3 stains after rotating VP2/3 images 90° to assess rate of random  
1270 association between the two (mean  $\pm$  SD, n=4). **G.** Quantification of VP1 foci in images  
1271 exemplified in **E**, averaged per well (mean  $\pm$  SD, n=4 for infected samples, n=2 for uninfected  
1272 samples).

1273

1274

1275

1276

1277

1278

1279

1280

1281

1282

1283

1284

1285

1286

1287

1288

1289

1290

1291

1292

1293

1294

1295 SUPPLEMENTAL FIGURES

1296

1297 **Supplemental Figure S1**

1298 **A.** Multiple sequence alignment of VP1 protein from BKV (P03088), JCV (P03089), SV40  
1299 (P03087), murine polyomavirus (MPy; P03090). VP1 pore residues that are proximal to D1<sub>min</sub>  
1300 peptide binding region are highlighted. Dots indicate conserved sequence, relative to BKV. **B.**  
1301 Multiple sequence alignment of VP2 proteins (BKV: P03094, JCV: P03095, SV40: P03093, MPy:  
1302 P03096). Sequence from which D1<sub>min</sub> is derived is highlighted. Alignment was performed using  
1303 Clustal Omega (Madeira et al., 2019).

1304

1305 **Supplemental Figure S2**

1306 **A.** <sup>1</sup>H,<sup>13</sup>C-HMQC spectra showing peptide (100 μM) induced perturbations of tr-VP1 (125 μM  
1307 protein + 25 μM peptide; black) ILVT methyl signals. Left: the wild-type peptide (magenta) induces  
1308 secondary CSPs (e.g. I45, see inset in upper corner), indicating micromolar binding to a second  
1309 site. The affected residues are clustered in the lower pore. Right: in contrast to the wild-type D1<sub>min</sub>,  
1310 the W293A alanine-substituted peptide (red) hardly induces secondary chemical shifts. This  
1311 observation suggests that secondary binding is very weak (millimolar *K<sub>D</sub>*). **B.** <sup>1</sup>H,<sup>13</sup>C-HMQC  
1312 spectra showing an inset of tr-VP1-I45V (100 μM; red) and wild-type tr-VP1 (100 μM; black) Ile  
1313 methyl signals. The isoleucine signal at 0.84 ppm (<sup>1</sup>H) / 12.80 ppm (<sup>13</sup>C) disappears when I45  
1314 gets mutated, making it possible to assign the residue. **C.** <sup>1</sup>H,<sup>13</sup>C-HMQC spectra showing peptide  
1315 (200 μM) induced perturbations of tr-VP1 (125 μM protein + 25 μM peptide; black) ILVT methyl  
1316 signals. Left: most of the VP1 peaks affected by the second site binding of the wild-type peptide  
1317 (magenta) show severe line broadening at 200 μM ligand concentration (see inset in upper  
1318 corner). This effect may be caused by specific or unspecific binding of multiple copies of the  
1319 peptide to the lower pore. Right: the W293A alanine-substituted peptide (red) does not induce  
1320 super-stoichiometric line broadening as its affinity for the secondary binding site is very low. **D-E.**

1321 Highlighting primary binding site (green) and secondary binding site (yellow) VP1 residues that  
1322 show peptide induced CSPs (PDB: 4MJ1; Neu et al., 2013).

1323

1324 **Supplemental Figure S3**

1325 **A.** Overlay of X-ray crystal structures from wild-type (magenta) or P232S (cyan) VP1 pentamer.

1326 **B.** Overlay of X-ray crystal structures from wild-type (magenta) or V234S (bronze) VP1 pentamer.

1327 **C.** Cutaway view of structurally guided model of D1<sub>min</sub> peptide bound to BKV VP1 showing 3 VP1

1328 molecules within the pentamer with D1<sub>min</sub> peptide bound. 2Fo-Fc electron density map, contoured

1329 at 1 $\sigma$ , is shown in blue. Experimental electron density is observed to occupy the upper region of

1330 the pore and has a distinct helical appearance. **D.** Alignment of structurally-guided model of

1331 ligand-bound (peptide not displayed) BKV pentamer (blue) to apo BKV pentamer (orange) (PDB:

1332 4MJ1; Neu et al., 2013) (RMSD: 0.85Å), with magnified view of pore residues T224, T226, V231,

1333 P232, and V234 (RMSD: 0.42Å, using previous whole-pentamer alignment).

1334

1335 **Supplemental Figure S4**

1336 **A.** Coomassie-stained SDS-PAGE of streptavidin-based affinity purification of biotinylated D1<sub>min</sub>

1337 peptides, assaying for co-affinity purification of VP1 protein in Figure 4. Sequences for peptides

1338 used in this assay can be found in **Supplemental Table S2**. VLP: virus-like particle.

1339

1340 **Supplemental Figure S5**

1341 **A.** Immunoblot for VP1 protein expressed from transient transfection of constructs used in

1342 spreading infection assay for **Figure 4E**. **B.** Immunoblot for VP2/3 protein expressed from

1343 transient transfection of constructs used in spreading infection assay for **Figure 4F**.

1344

1345 SUPPLEMENTAL TABLES

1346

1347 **Supplemental Table S1.** JCV VP1 binding data

| Peptide Name         | Sequence               | AlphaScreen JCV VP1 IC <sub>50</sub> (nM) | SPR JCV VP1 K <sub>D</sub> (nM) |
|----------------------|------------------------|-------------------------------------------|---------------------------------|
| BKV D1 <sub>22</sub> | APGGANQRTAPQWMLPLLLGLY | 90±19                                     | 13                              |
| JCV D1 <sub>22</sub> | APGGANQRSAPQWMLPLLLGLY | 44±6.4                                    | 8.4                             |

1348

1349 **Supplemental Table S2.** Additional peptide information

| Peptide Name                | Sequence                                      | AlphaScreen VP1 IC <sub>50</sub> (µM) | Relative IC <sub>50</sub> (vs D1 <sub>min</sub> ) |
|-----------------------------|-----------------------------------------------|---------------------------------------|---------------------------------------------------|
| TAT-D1 <sub>min</sub>       | GRKKRRQRRR-PEG2-APQWMLPLLLGLY-NH <sub>2</sub> | 0.0027±0.00013                        | 0.67                                              |
| D1 <sub>min</sub> -TAT      | Ac-APQWMLPLLLGLY-PEG2-GRKKRRQRRR              | <0.0015, <0.0015                      | < 0.38                                            |
| D1 <sub>min</sub> TRI01     | Ac-APQ-NH <sub>2</sub>                        | >250, >250                            | > 62500                                           |
| D1 <sub>min</sub> TRI02     | Ac-PQW-NH <sub>2</sub>                        | 100±5.1                               | 26000                                             |
| D1 <sub>min</sub> TRI03     | Ac-QWM-NH <sub>2</sub>                        | >250, >250                            | > 62500                                           |
| D1 <sub>min</sub> TRI04     | Ac-WML-NH <sub>2</sub>                        | 88±1.4                                | 22000                                             |
| D1 <sub>min</sub> TRI05     | Ac-MLP-NH <sub>2</sub>                        | 200±9.3                               | 49000                                             |
| D1 <sub>min</sub> TRI06     | Ac-LPL-NH <sub>2</sub>                        | >250, >125                            | > 62500                                           |
| D1 <sub>min</sub> TRI07     | Ac-PLL-NH <sub>2</sub>                        | 130±5.3                               | 33000                                             |
| D1 <sub>min</sub> TRI08     | Ac-LLL-NH <sub>2</sub>                        | 160±11                                | 41000                                             |
| D1 <sub>min</sub> TRI09     | Ac-LLG-NH <sub>2</sub>                        | 7.3±0.17                              | 1800                                              |
| D1 <sub>min</sub> TRI10     | Ac-LGL-NH <sub>2</sub>                        | >250, >250                            | > 62500                                           |
| D1 <sub>min</sub> TRI11     | Ac-GLY-NH <sub>2</sub>                        | >250, >250                            | > 62500                                           |
| biotin-D1 <sub>22</sub>     | biotin-GGGGAPGGANQRTAPQWMLPLLLGLY             | N/A                                   | N/A                                               |
| D1 <sub>22</sub> -biotin    | APGGANQRTAPQWMLPLLLGLYGGGGK-biotin            | N/A                                   | N/A                                               |
| D1 <sub>22</sub> -ex-biotin | APGGANQRTAPQWMLPLLLGLYGTVTPGGGGK-biotin       | N/A                                   | N/A                                               |

1350

1351

1352

1353

1354

1355

1356

1357

1358

1359

1360



1361 **Supplemental Table S3.** Data collection and refinement statistics (molecular replacement)

| BKV VP1 pentamer-D1 <sub>min</sub>                   |                       |
|------------------------------------------------------|-----------------------|
| <b>Data collection</b>                               |                       |
| Space group                                          | P 21 21 21            |
| Cell dimensions                                      |                       |
| <i>a</i> , <i>b</i> , <i>c</i> (Å)                   | 89.47, 124.27, 127.83 |
| α, β, γ (°)                                          | 90.00, 90.00, 90.00   |
| Resolution (Å)                                       | 89.10 – 2.36          |
| <i>R</i> <sub>sym</sub> or <i>R</i> <sub>merge</sub> | 0.09(0.705)           |
| <i>CC</i> <sub>1/2</sub>                             | 0.972(0.30)           |
| <i>I</i> / σ <i>I</i>                                | 14.9(4.5)             |
| Completeness (%)                                     | 99.9 (99.7)           |
| Redundancy                                           | 22.0(14.7)            |
| <b>Refinement</b>                                    |                       |
| Resolution (Å)                                       | 44.70-2.36            |
| No. reflections                                      | 16198                 |
| <i>R</i> <sub>work</sub> / <i>R</i> <sub>free</sub>  | 0.199/0.257           |
| No. atoms                                            |                       |
| Protein                                              | 3106                  |
| Ligand/ion                                           | 2                     |
| Water                                                | 195                   |
| <i>B</i> -factors                                    |                       |
| Protein                                              | 58.63                 |
| Ligand/ion                                           | 34.10                 |
| Water                                                | 50.32                 |
| R.m.s. deviations                                    |                       |
| Bond lengths (Å)                                     | 0.010                 |
| Bond angles (°)                                      | 1.13                  |

1362

1363 **Supplemental Table S4.** Control inhibitor half-maximal effective concentrations (EC<sub>50</sub>) and half-

1364 maximal cytotoxic concentrations (CC<sub>50</sub>).

| Inhibitor              | Type                | EC <sub>50</sub> (nM) | CC <sub>50</sub> (μM) |
|------------------------|---------------------|-----------------------|-----------------------|
| TAT-D1 <sub>min</sub>  | peptide             | 100                   | 9.6                   |
| D1 <sub>min</sub> -TAT | peptide             | 79                    | 7.5                   |
| P8D11                  | monoclonal antibody | 0.35<br>(50 ng/mL)    | Not observed          |

1365

# Figure 1

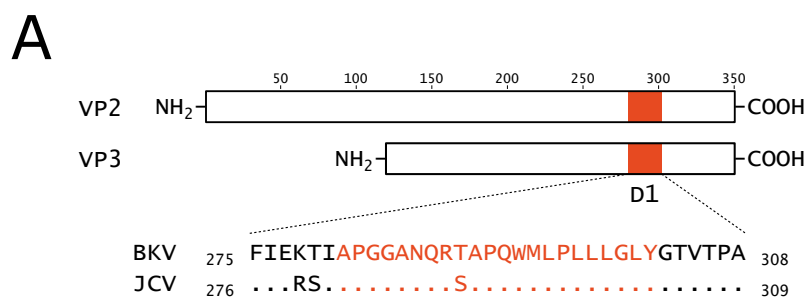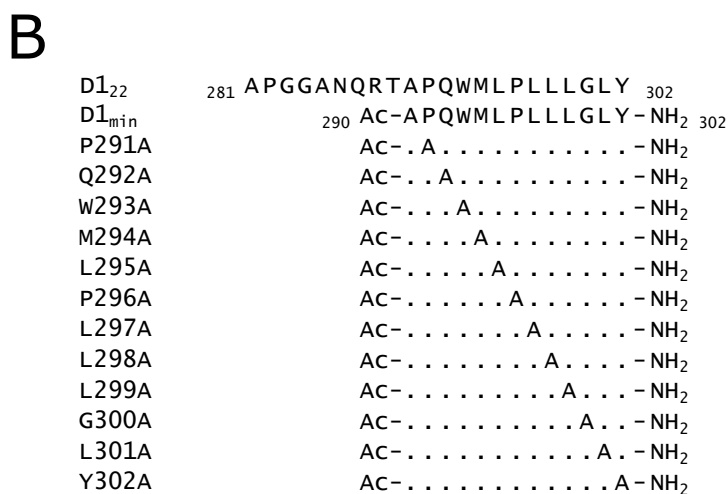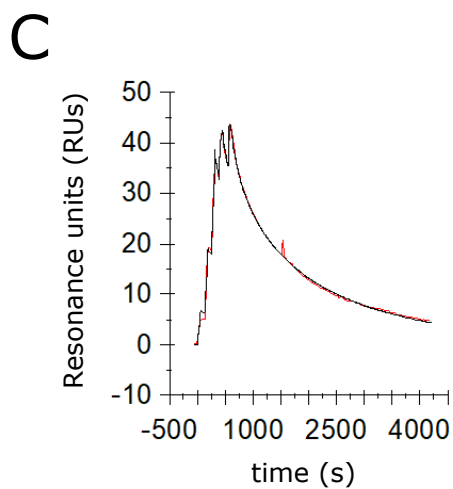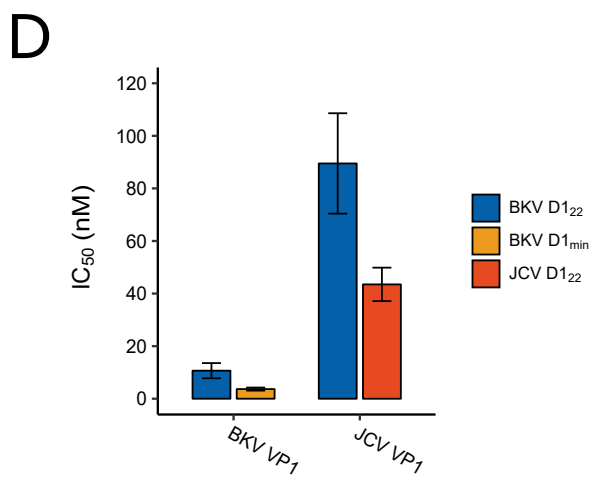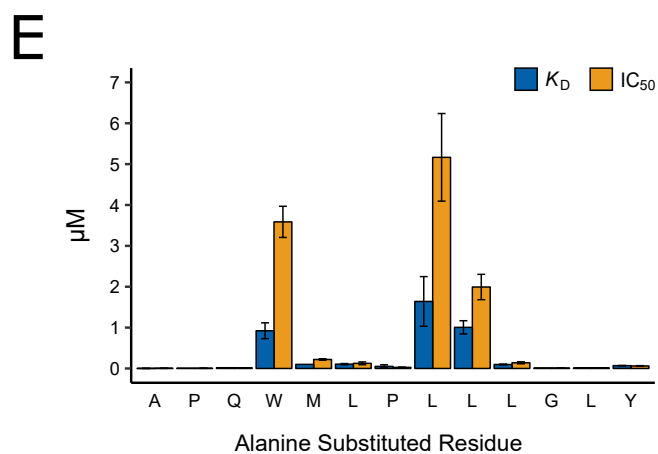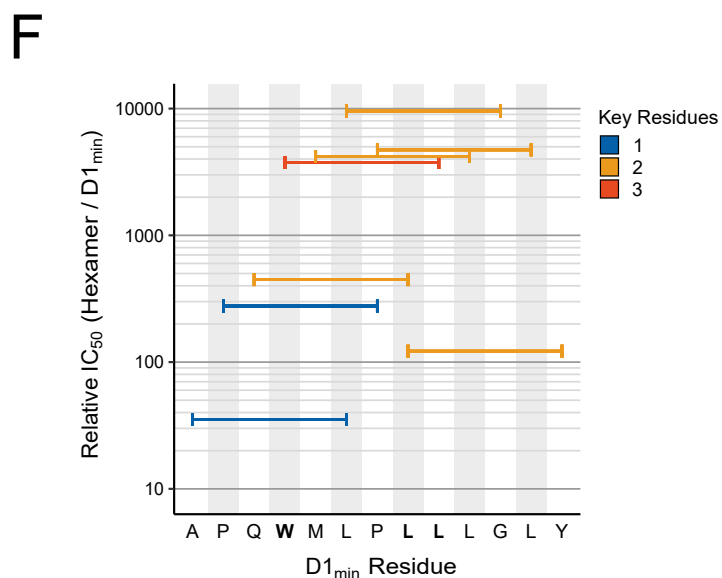

# Figure 2

## A

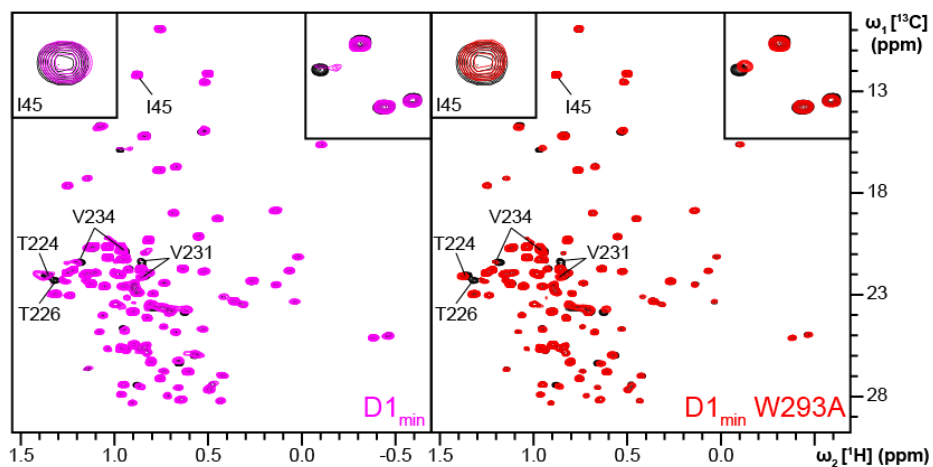

## B

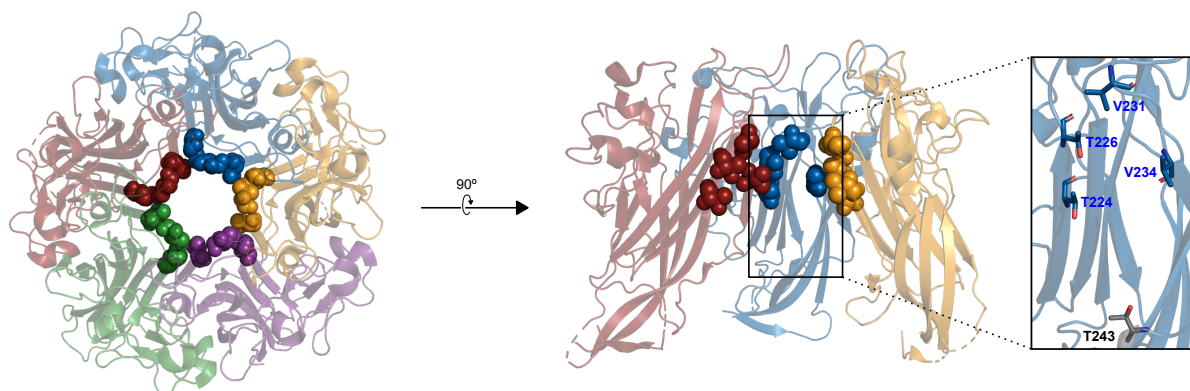

## C

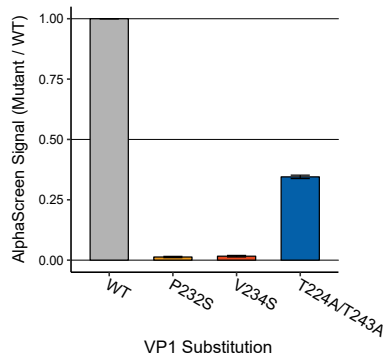

## D

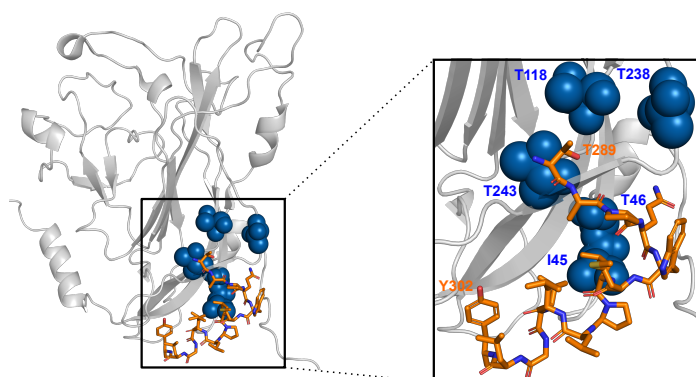

## Figure 3

A

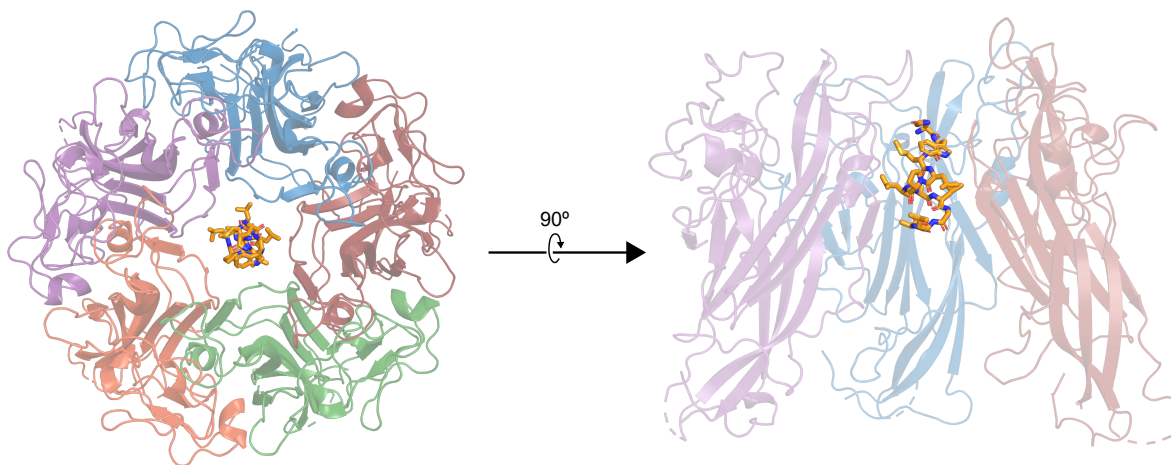

B

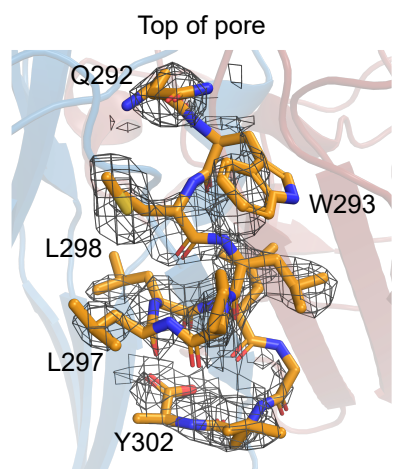

C

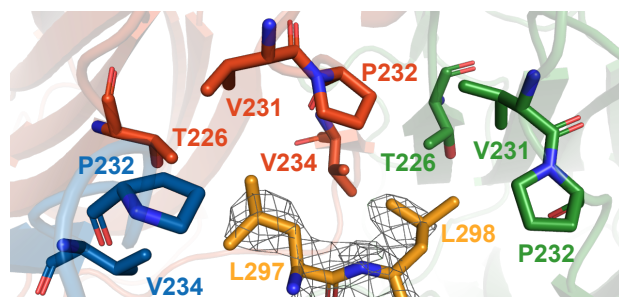

# Figure 4

bioRxiv preprint doi: <https://doi.org/10.1101/720318>; this version posted August 8, 2019. The copyright holder for this preprint (which was not certified by peer review) is the author/funder, who has granted bioRxiv a license to display the preprint in perpetuity. It is made available under aCC-BY-NC-ND 4.0 International license.

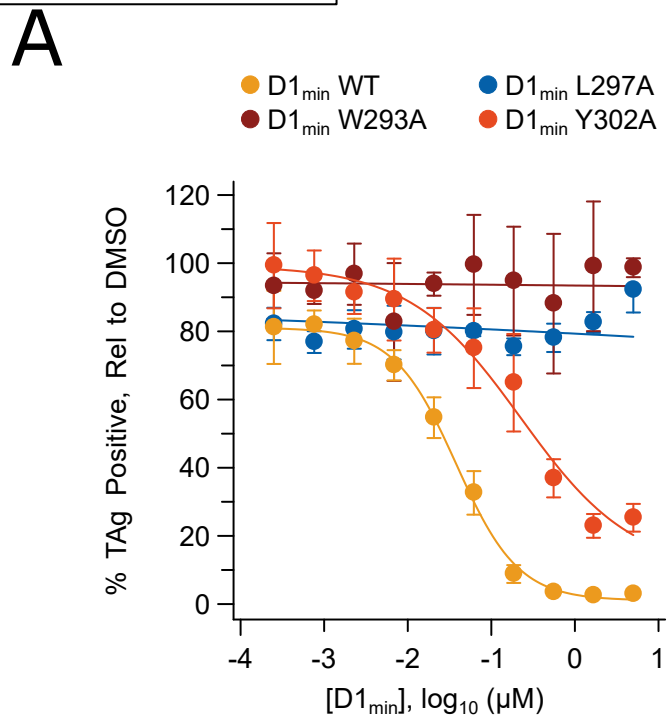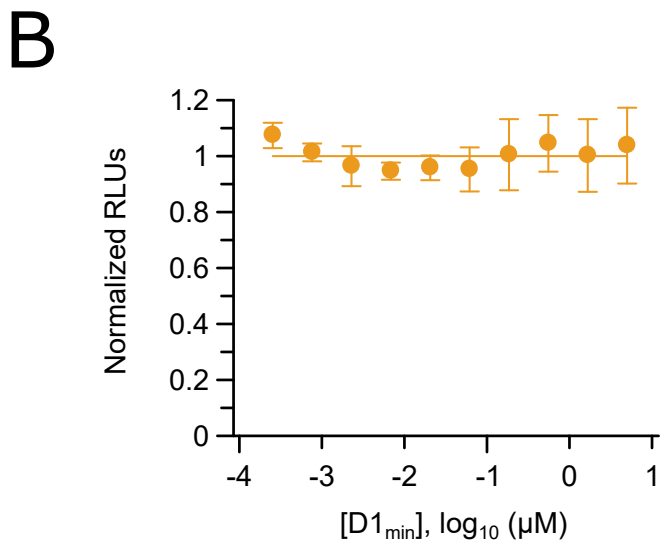

**C**

| D1 <sub>min</sub> treatment, COS-7 cells |                       |             |
|------------------------------------------|-----------------------|-------------|
|                                          | EC <sub>50</sub> (nM) | 95% CI (nM) |
| BKV                                      | 220                   | 87 - 350    |
| JCV                                      | 350                   | 100 - 590   |

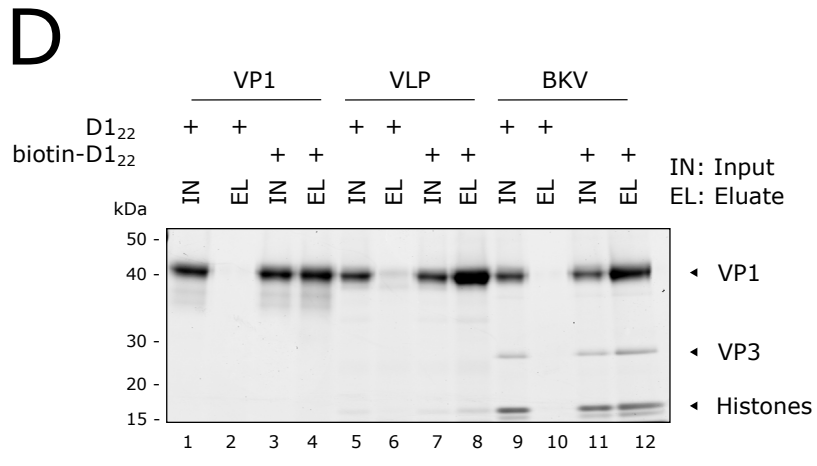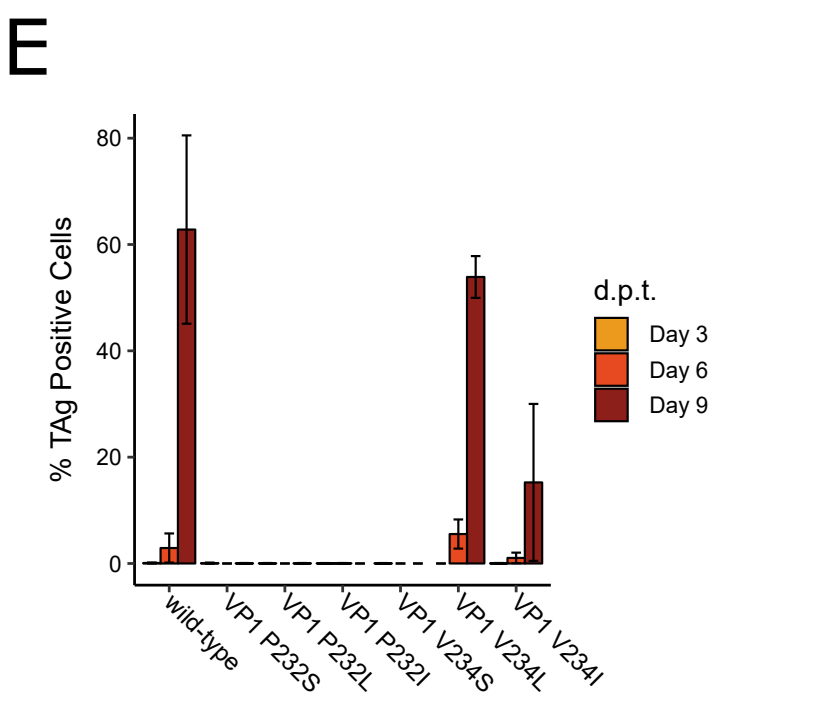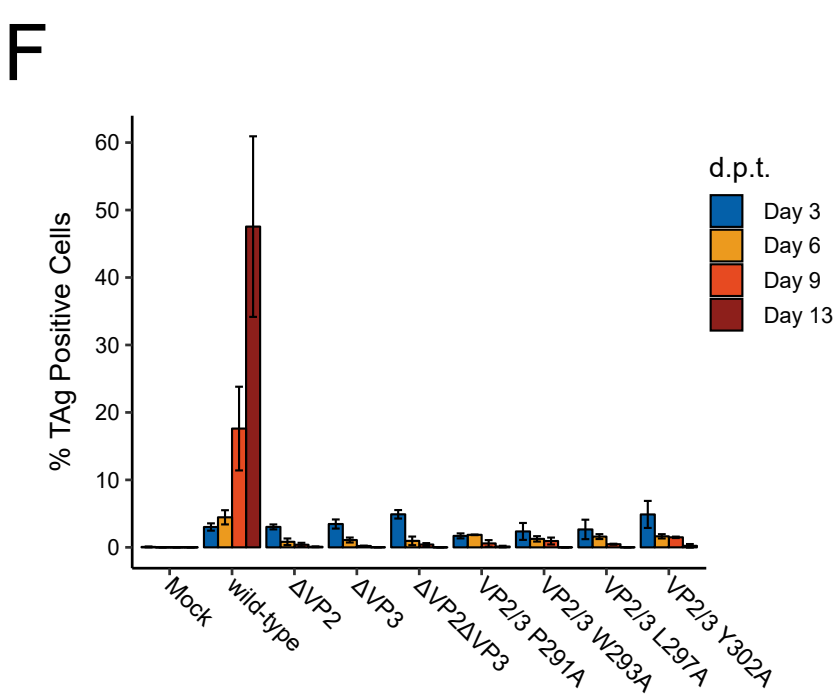

# Figure 5

bioRxiv preprint doi: <https://doi.org/10.1101/720318>; this version posted August 8, 2019. The copyright holder for this preprint (which was not certified by peer review) is the author/funder, who has granted bioRxiv a license to display the preprint in perpetuity. It is made available under aCC-BY-NC-ND 4.0 International license.

## A

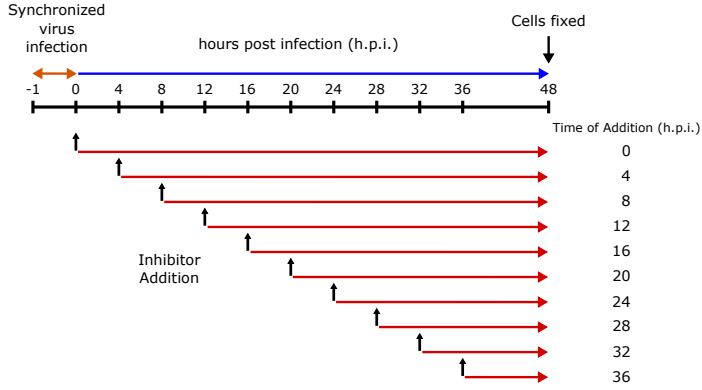

## B

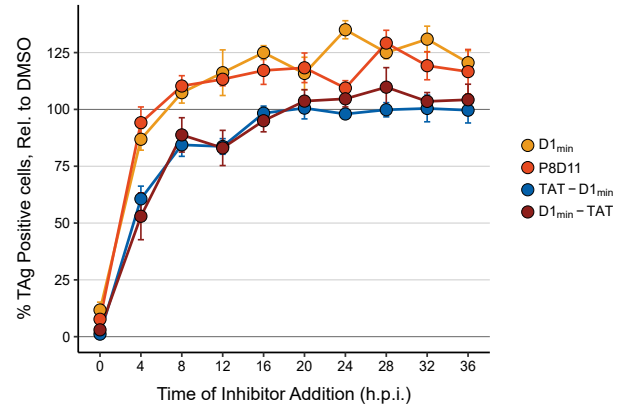

## C

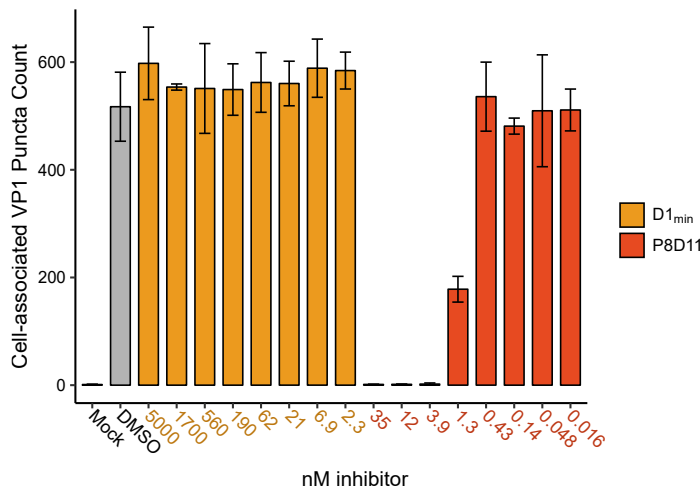

## D

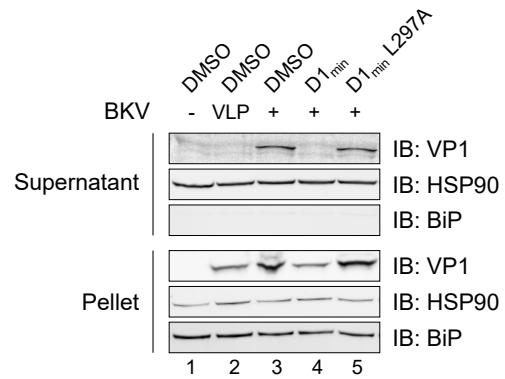

## E

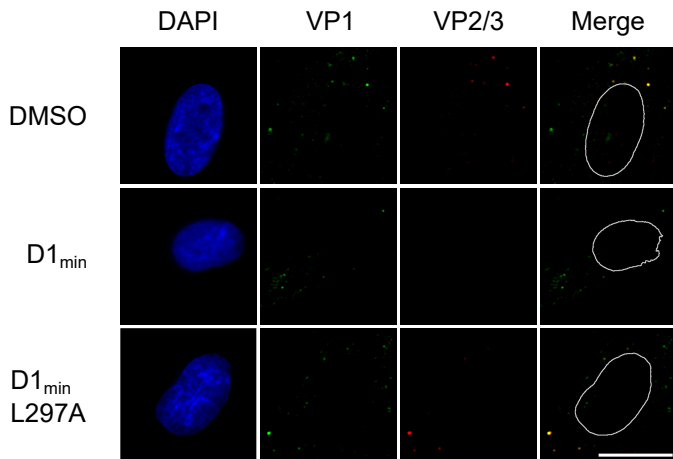

## F

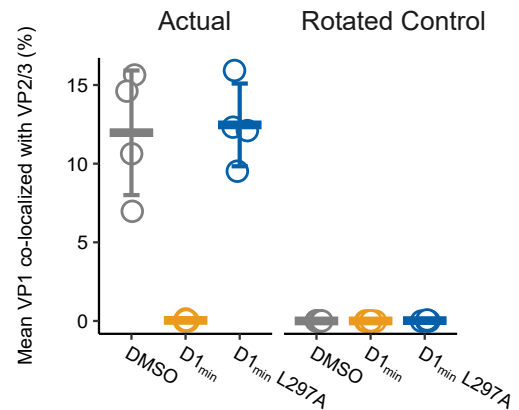

## G

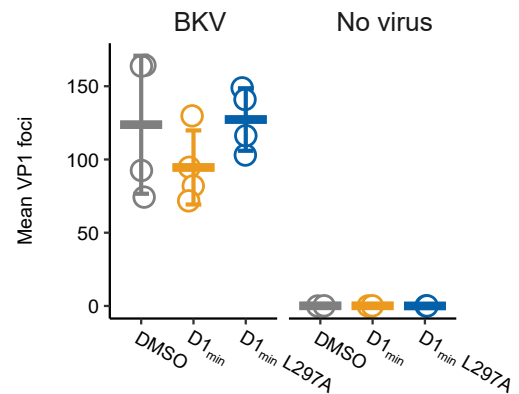

Source: https://www.biorxiv.org/content/biorxiv/early/2019/08/08/720318.full.pdf
